# Supplementary material
Source: PubMed Central journal article supplement (PMC4286605)
Supplement: mmc1.pdf [file mmc1.pdf]

# Supporting Material

## Multiscale model of dynamic neuromodulation integrating neuropeptide induced signaling pathway activity with membrane electrophysiology

Hirenkumar K. Makadia<sup>1,†</sup>, Warren D. Anderson<sup>1,2,†</sup>, Dirk Fey<sup>3,†</sup>, Thomas Sauter<sup>4</sup>,  
James S. Schwaber<sup>1,2</sup>, and Rajanikanth Vadigepalli<sup>1,2,\*</sup>

<sup>1</sup>Daniel Baugh Institute for Functional Genomics and Computational Biology, Department of Pathology,  
Anatomy and Cell Biology, Sidney Kimmel Medical College, Thomas Jefferson University, Philadelphia,  
PA, USA

<sup>2</sup>Graduate program in Neuroscience, Thomas Jefferson University, Philadelphia, PA, USA

<sup>3</sup>Systems Biology Ireland, University College Dublin, Dublin, Ireland

<sup>4</sup>University of Luxembourg, Life Sciences Research Unit, Luxembourg, Luxembourg

<sup>†</sup>These authors contributed equally to this work.

\*Correspondence: [Rajanikanth.Vadigepalli@jefferson.edu](mailto:Rajanikanth.Vadigepalli@jefferson.edu).

## S1 Material balance of cytosolic calcium

Intracellular  $\text{Ca}^{2+}$  levels in the model were modulated by calcium currents ( $I_{\text{Ca}_L}$  and  $I_{\text{NaCa}}$ ), in addition to a capacitive  $\text{Ca}^{2+}$  entry to the ER, a membrane calcium pump, and  $\text{Ca}^{2+}$  buffering processes in the ER (Figure 2A). Excess  $\text{Ca}^{2+}$  in intracellular levels is transported to ER and stored in  $\text{Ca}^{2+}$  buffer, which is released by IP3R activation. The mass balance of intracellular (cytosolic)  $\text{Ca}^{2+}$  is given by

$$\frac{d[\text{Ca}^{2+}_{\text{cyt}}]}{dt} = \underbrace{\frac{I_{\text{NaCa}} - I_{\text{Ca}_L}}{z v_{\text{cell}} F} - r_{\text{Epump}}}_{\text{Extracellular}} + \underbrace{N \cdot [\text{CaBuffer}]_{\text{T}} \left( k_{\text{ER}}^{\text{Ca}^{2+}} \cdot [\text{Ca}^{2+}_{\text{cyt}}] \cdot (1 - [\text{CaBuffer}]_{\text{B}}) - k_{-\text{ER}}^{\text{Ca}^{2+}} \cdot [\text{CaBuffer}]_{\text{B}} \right)}_{\text{Endoplasmic Reticulum}} \quad (1)$$

where  $I_{\text{NaCa}}$  is the NCX current,  $I_{\text{Ca}_L}$  is the L-type calcium channel current,  $z(=2)$  is valency of  $\text{Ca}^{2+}$  ion,  $F$  is the Faraday's constant,  $v_{\text{cell}}$  is the soma volume,  $r_{\text{Epump}}$  is the rate of  $\text{Ca}^{2+}$  transfer through extracellular pump,  $N(=40)$  is the number of binding sites on CaBuffer,  $[\text{CaBuffer}]_{\text{T}}$  is the total concentration of  $\text{Ca}^{2+}$  buffer in ER,  $[\text{CaBuffer}]_{\text{B}}$  is the concentration of bounded  $\text{Ca}^{2+}$  buffer in ER,  $k_{\text{ER}}^{\text{Ca}^{2+}}$  is the inward rate of  $\text{Ca}^{2+}$  flux to the ER, and  $k_{-\text{ER}}^{\text{Ca}^{2+}}$  is the outward rate of  $\text{Ca}^{2+}$  flux from the ER.

## S2 Electrophysiology model details

We modeled neurophysiology with an electrical circuit (Figure 1B) containing multiple ionic currents, balanced across the membrane as shown in eqs. (2) to (5)

$$C \frac{dV}{dt} = - \sum_i g_i(V) (V - E_i) \quad (2)$$

$$g_i(V) = \bar{g}_i \cdot m_i^{M_i}(V) \cdot h_i^{H_i}(V) \quad (3)$$

$$\tau_{m,i} \frac{dm_i}{dt} = m_{\infty,i} - m_i ; \quad \tau_{h,i} \frac{dh_i}{dt} = h_{\infty,i} - h_i \quad (4)$$

$$m_{\infty,i} = \left( 1 + \exp \left( - \frac{V - V_{1/2,m,i}}{k_{m,i}} \right) \right)^{-x} ; \quad h_{\infty,i} = \left( 1 + \exp \left( \frac{V - V_{1/2,h,i}}{k_{h,i}} \right) \right)^{-x} \quad (5)$$

where  $C$  is the membrane capacitance;  $V$  is the voltage across the membrane; and for each ion channel  $i$ ,  $g_i$  is the conductance,  $E_i$  is the reversal potential,  $\bar{g}_i$  is the maximal conductance,  $m_i$  is the activation variable,  $h_i$  is the inactivation variable, and  $M_i$  and  $H_i$  are suitable parameters that are dependent on the kinetics of the channel activation/inactivation.

The time-varying membrane potential-dependent functions  $m_i(V)$ ,  $h_i(V)$  in eq. (4) are typically described using nonlinear functions (e.g.,  $m_{\infty,i} = f(V)$ ) depending on the parameterized form of Boltzmann functions characterized by half-activation voltage,  $V_{1/2}$  and activation curve slope factor,  $k$ .

For channels characterized by the Hodgkin-Huxley formalism, the gating variable ( $p_i$ , analogous to  $m_i$  and  $h_i$ ) is based on the probability of an individual gate being in a permissive state. Thus  $(1 - p_i)$  is the probability of a non-permissive state. The transition between these states is described by first order kinetics:

$$\frac{dp_i}{dt} = \alpha_i(V)(1 - p_i) - \beta_i(V)p_i \quad (6)$$

in which  $\alpha_i$  and  $\beta_i$  are voltage-dependent rate constants describing the “non-permissive to permissive” and “permissive to non-permissive” transition rates, respectively. The time course for approaching the equilibrium value of the gating variable ( $p_{\infty,i}$ ) can be described by a  $\tau_i$  term. The resulting expressions used for solving eq. (6) are:

$$p_{\infty,i} = \frac{\alpha_i(V)}{\alpha_i(V) + \beta_i(V)} \quad \tau_{p,i} = \frac{1}{\alpha_i(V) + \beta_i(V)} \quad (7)$$

In our modified model,  $K_{DR}$  activation was represented by a fourth order Boltzmann function ( $x = 4$  in eq. (5)) based on experimental data from rat brain thalamic relay neurons [1]. The half activation voltage was set to 2.3 mV based on voltage-clamp data from brainstem neurons [2]. Our electrophysiology model was simulated as a single compartment (Figure 1B) with the following properties [3]: cell area = 0.0025 mm<sup>2</sup>, membrane capacitance  $C_m = 1$  uF/cm<sup>2</sup>, and  $E_{leak}$  was set to maintain baseline firing rates at approximately 1.1 Hz in all simulations.

### S3 Calcium baseline-dependent dampening of electrophysiological responses to AngII

We found that the baseline firing rate was elevated in the high  $Ca^{2+}$  baseline state (Figure S2A). This finding is consistent with elevated levels of active PKC and CaMKII leading to increased levels of  $K_{DR}$  phosphorylation and coincident reduction in hyperpolarizing drive. The excitability response for the high  $Ca^{2+}$  baseline condition was smaller and slower than that of the low  $Ca^{2+}$  baseline response. However, the steady state firing rates ( $t = 300$  s) for high and low  $Ca^{2+}$  states were nearly identical, indicating that AngII normalizes the firing rates of cells with divergent  $Ca^{2+}$  baseline levels. To determine the electrophysiological basis of the observed excitability differences, we first examined membrane potential traces before and after applying AngII (Figure S2B). Membrane potentials during inter-spike intervals were at approximately -50 mV for both  $Ca^{2+}$  baseline conditions. Action potential waveforms and thresholds were also similar for high and low  $Ca^{2+}$  baseline states, both before and after applying AngII (Figure S2C). These results suggest that subtle differences in ionic currents during inter-spike intervals account for the  $Ca^{2+}$  baseline-dependent differences in firing rates.

To assess the ionic contributions to the membrane potential during inter-spike intervals, we examined membrane potential and current waveforms mediated by  $Na^+$ ,  $K_{DR}$ , and  $K_{AHP}$  channels during intervals between APs ( $K_A$  and  $Ca_L$  currents were omitted because these did not vary in our simulations) (Figure S2D). For the high  $Ca^{2+}$  baseline state, firing rates were faster but the membrane potential was more hyperpolarized between APs. The high  $Ca^{2+}$  baseline state showed reduced  $Na^+$  and  $K_{DR}$  currents along with increased  $K_{AHP}$  current between APs, compared to the low  $Ca^{2+}$  baseline state. These results are consistent with increased excitability in the high  $Ca^{2+}$  baseline states associated with enhanced  $Na^+$  recovery from inactivation (Figure S3). Following AngII application, excitability properties were nearly identical for the low and high  $Ca^{2+}$  baseline states. This suggests that AngII drives divergent  $Ca^{2+}$  baseline neuronal conditions to a comparable electrophysiological state.

Table S1: **List of signaling pathway models.**

| No. | Signaling pathway models                          | Initial parameter Ref. |
|-----|---------------------------------------------------|------------------------|
| 1   | Gq pathway activation                             | [4–6]                  |
| 2   | PLC $\beta$ hydrolysis                            | [4]                    |
| 3   | IP3 3-kinase activation                           | [4]                    |
| 4   | I(145)P3 dephosphorylation                        | [4]                    |
| 5   | I(1345)P4 dephosphorylation                       | [4]                    |
| 6   | Multiple inositol polyphosphate phosphatase       | [4]                    |
| 7   | Interactions between Inositol high polyphosphates | [4]                    |
| 8   | Dynamics of IP4 interactions                      | [4]                    |
| 9   | I(134)P3 dephosphorylation                        | [4]                    |
| 10  | Calcium regulation                                | [3, 4, 7–11]           |
| 11  | Calcium binding to calmodulin                     | [4]                    |
| 12  | CaMKII activation                                 | [4, 12]                |
| 13  | Protein kinase C activation                       | [4, 7, 12, 13]         |

Table S2: Calcium regulation model. A schematic of the model is shown in [Figure 2A](#).

| Modulation                                                                                                                                                                                                                                                                                                                                                                                                                                                                                                                         | Reaction                                                                                                                                                                                                                                                                                                                                                                                                                                                                                                                                                                                                                                                                                                                                                                                                                | Parameters                                                            | Ref. |        |
|------------------------------------------------------------------------------------------------------------------------------------------------------------------------------------------------------------------------------------------------------------------------------------------------------------------------------------------------------------------------------------------------------------------------------------------------------------------------------------------------------------------------------------|-------------------------------------------------------------------------------------------------------------------------------------------------------------------------------------------------------------------------------------------------------------------------------------------------------------------------------------------------------------------------------------------------------------------------------------------------------------------------------------------------------------------------------------------------------------------------------------------------------------------------------------------------------------------------------------------------------------------------------------------------------------------------------------------------------------------------|-----------------------------------------------------------------------|------|--------|
| Calcium transport to ER                                                                                                                                                                                                                                                                                                                                                                                                                                                                                                            | $2\text{Ca}_{\text{cyt}}^{2+} + \text{CaTransp} \xrightleftharpoons[k_b]{k_f} \text{CaTransp} - 2\text{Ca}^{2+}$                                                                                                                                                                                                                                                                                                                                                                                                                                                                                                                                                                                                                                                                                                        | $k_f = 3600 \mu\text{M}^{-2}\text{s}^{-1}; k_b = 144 \text{s}^{-1}$   | [4]  |        |
|                                                                                                                                                                                                                                                                                                                                                                                                                                                                                                                                    | $\text{CaTransp} - 2\text{Ca}^{2+} \xrightarrow{k_f} \text{CaTransp} + 2\text{Ca}_{\text{seq}}^{2+}$                                                                                                                                                                                                                                                                                                                                                                                                                                                                                                                                                                                                                                                                                                                    | $k_f = 25 \text{s}^{-1}$                                              |      |        |
|                                                                                                                                                                                                                                                                                                                                                                                                                                                                                                                                    | $\text{Ca}_{\text{seq}}^{2+} + \text{CaTransp} \xrightleftharpoons[k_b]{k_f} \text{CaTransp} + \text{Ca}_{\text{cyt}}^{2+}$                                                                                                                                                                                                                                                                                                                                                                                                                                                                                                                                                                                                                                                                                             | $k_f = 8 \text{s}^{-1}; k_b = 8 \text{s}^{-1}$                        |      |        |
| Calcium buffer                                                                                                                                                                                                                                                                                                                                                                                                                                                                                                                     | $5\text{Ca}_{\text{seq}}^{2+} + \text{Cabuffer} \xrightleftharpoons[k_b]{k_f} \text{Cabuffer} - 5\text{Ca}^{2+}$                                                                                                                                                                                                                                                                                                                                                                                                                                                                                                                                                                                                                                                                                                        | $k_f = 0.000489 \mu\text{M}^{-5}\text{s}^{-1}; k_b = 1 \text{s}^{-1}$ | [4]  |        |
|                                                                                                                                                                                                                                                                                                                                                                                                                                                                                                                                    | $5\text{Ca}_{\text{seq}}^{2+} + \text{Cabuffer} - 5\text{Ca}^{2+} \xrightleftharpoons[k_b]{k_f} \text{Cabuffer} - 10\text{Ca}^{2+}$                                                                                                                                                                                                                                                                                                                                                                                                                                                                                                                                                                                                                                                                                     | $k_f = 0.000489 \mu\text{M}^{-5}\text{s}^{-1}; k_b = 1 \text{s}^{-1}$ |      |        |
|                                                                                                                                                                                                                                                                                                                                                                                                                                                                                                                                    | $5\text{Ca}_{\text{seq}}^{2+} + \text{Cabuffer} - 10\text{Ca}^{2+} \xrightleftharpoons[k_b]{k_f} \text{Cabuffer} - 15\text{Ca}^{2+}$                                                                                                                                                                                                                                                                                                                                                                                                                                                                                                                                                                                                                                                                                    | $k_f = 0.000489 \mu\text{M}^{-5}\text{s}^{-1}; k_b = 1 \text{s}^{-1}$ |      |        |
|                                                                                                                                                                                                                                                                                                                                                                                                                                                                                                                                    | $5\text{Ca}_{\text{seq}}^{2+} + \text{Cabuffer} - 15\text{Ca}^{2+} \xrightleftharpoons[k_b]{k_f} \text{Cabuffer} - 20\text{Ca}^{2+}$                                                                                                                                                                                                                                                                                                                                                                                                                                                                                                                                                                                                                                                                                    | $k_f = 0.000489 \mu\text{M}^{-5}\text{s}^{-1}; k_b = 1 \text{s}^{-1}$ |      |        |
|                                                                                                                                                                                                                                                                                                                                                                                                                                                                                                                                    | $5\text{Ca}_{\text{seq}}^{2+} + \text{Cabuffer} - 20\text{Ca}^{2+} \xrightleftharpoons[k_b]{k_f} \text{Cabuffer} - 25\text{Ca}^{2+}$                                                                                                                                                                                                                                                                                                                                                                                                                                                                                                                                                                                                                                                                                    | $k_f = 0.000489 \mu\text{M}^{-5}\text{s}^{-1}; k_b = 1 \text{s}^{-1}$ |      |        |
|                                                                                                                                                                                                                                                                                                                                                                                                                                                                                                                                    | $5\text{Ca}_{\text{seq}}^{2+} + \text{Cabuffer} - 25\text{Ca}^{2+} \xrightleftharpoons[k_b]{k_f} \text{Cabuffer} - 30\text{Ca}^{2+}$                                                                                                                                                                                                                                                                                                                                                                                                                                                                                                                                                                                                                                                                                    | $k_f = 0.000489 \mu\text{M}^{-5}\text{s}^{-1}; k_b = 1 \text{s}^{-1}$ |      |        |
|                                                                                                                                                                                                                                                                                                                                                                                                                                                                                                                                    | $5\text{Ca}_{\text{seq}}^{2+} + \text{Cabuffer} - 30\text{Ca}^{2+} \xrightleftharpoons[k_b]{k_f} \text{Cabuffer} - 35\text{Ca}^{2+}$                                                                                                                                                                                                                                                                                                                                                                                                                                                                                                                                                                                                                                                                                    | $k_f = 0.000489 \mu\text{M}^{-5}\text{s}^{-1}; k_b = 1 \text{s}^{-1}$ |      |        |
|                                                                                                                                                                                                                                                                                                                                                                                                                                                                                                                                    | $5\text{Ca}_{\text{seq}}^{2+} + \text{Cabuffer} - 35\text{Ca}^{2+} \xrightleftharpoons[k_b]{k_f} \text{Cabuffer} - 40\text{Ca}^{2+}$                                                                                                                                                                                                                                                                                                                                                                                                                                                                                                                                                                                                                                                                                    | $k_f = 0.000489 \mu\text{M}^{-5}\text{s}^{-1}; k_b = 1 \text{s}^{-1}$ |      |        |
| Capacitive calcium entry to ER                                                                                                                                                                                                                                                                                                                                                                                                                                                                                                     | $\text{Ca}_{\text{seq}}^{2+} + \text{Capacitive} - \text{Ca}_{\text{active}} \xrightleftharpoons[k_b]{k_f} \text{Capacitive} - \text{Ca}_{\text{inactive}}$                                                                                                                                                                                                                                                                                                                                                                                                                                                                                                                                                                                                                                                             | $k_f = 0.6912 \#^{-1}\text{s}^{-1}; k_b = 6.25 \text{s}^{-1}$         | [4]  |        |
| Calcium extracellular pump                                                                                                                                                                                                                                                                                                                                                                                                                                                                                                         | $\text{Ca}_{\text{cyt}}^{2+} + \text{CaEpump} \xrightleftharpoons[k_b]{k_f} \text{CaEpump} - \text{Ca}^{2+}$                                                                                                                                                                                                                                                                                                                                                                                                                                                                                                                                                                                                                                                                                                            | $k_f = 1800 \mu\text{M}^{-1}\text{s}^{-1}; k_b = 288 \text{s}^{-1}$   | [4]  |        |
|                                                                                                                                                                                                                                                                                                                                                                                                                                                                                                                                    | $\text{CaEpump} - \text{Ca}^{2+} \xrightarrow{k_f} \text{Ca}_{\text{ext}}^{2+}$                                                                                                                                                                                                                                                                                                                                                                                                                                                                                                                                                                                                                                                                                                                                         | $k_f = 72 \text{s}^{-1}$                                              |      |        |
|                                                                                                                                                                                                                                                                                                                                                                                                                                                                                                                                    | $\text{Ca}_{\text{ext}}^{2+} + \text{CaEpump}_{\text{leak}} \xrightleftharpoons[k_b]{k_f} \text{CaEpump}_{\text{leak}} + \text{Ca}_{\text{cyt}}^{2+}$                                                                                                                                                                                                                                                                                                                                                                                                                                                                                                                                                                                                                                                                   | $k_f = 0.2 \text{s}^{-1}; k_b = 0.2 \text{s}^{-1}$                    |      |        |
|                                                                                                                                                                                                                                                                                                                                                                                                                                                                                                                                    | $\text{Ca}_{\text{ext}}^{2+} + \text{CapacitiveChannel} \xrightleftharpoons[k_b]{k_f} \text{CapacitiveChannel} + \text{Ca}_{\text{cyt}}^{2+}$                                                                                                                                                                                                                                                                                                                                                                                                                                                                                                                                                                                                                                                                           | $k_f = 0.01 \text{s}^{-1}; k_b = 0.01 \text{s}^{-1}$                  |      |        |
| IP3R activation                                                                                                                                                                                                                                                                                                                                                                                                                                                                                                                    | $\text{IP3R} + 3\text{IP3} - 145 \xrightleftharpoons[k_b]{k_f} \text{IP3R}_{\text{active}}$                                                                                                                                                                                                                                                                                                                                                                                                                                                                                                                                                                                                                                                                                                                             | $k_f = 0.05 \mu\text{M}^{-3}\text{s}^{-1}; k_b = 1 \text{s}^{-1}$     | [4]  |        |
|                                                                                                                                                                                                                                                                                                                                                                                                                                                                                                                                    | $\text{Ca}_{\text{seq}}^{2+} + \text{IP3R}_{\text{active}} \xrightleftharpoons[k_b]{k_f} \text{IP3R}_{\text{active}} + \text{Ca}_{\text{cyt}}^{2+}$                                                                                                                                                                                                                                                                                                                                                                                                                                                                                                                                                                                                                                                                     | $k_f = 3125 \text{s}^{-1}; k_b = 3125 \text{s}^{-1}$                  |      |        |
| Sodium-calcium exchanger                                                                                                                                                                                                                                                                                                                                                                                                                                                                                                           | $r_{\text{NaCa}} = r_o \cdot m_{\text{GHK}} \cdot m_{\text{chemical}}$ $m_{\text{chemical}} = - \left( 1 + \frac{K_{\text{PKCmod}}}{1 + \exp\left(\frac{K_{\text{PKC}} - 100[\text{PKC}]}{D_{\text{PKC}}}\right) - 3} \right) \left( \frac{[\text{Ca}_{\text{cyt}}^{2+}]}{k_m + [\text{Ca}_{\text{cyt}}^{2+}]} \right) \left( \frac{[\text{Ca}_{\text{cyt}}^{2+}]}{\text{NaCa}_{\text{act}} + [\text{Ca}_{\text{cyt}}^{2+}]} \right)$ $m_{\text{GHK}} = - \frac{\left( [\text{Ca}_{\text{ext}}^{2+}][\text{Na}_{\text{cyt}}^+]^3 \exp(\gamma\zeta) \right) - \left( [\text{Ca}_{\text{cyt}}^{2+}][\text{Na}_{\text{ext}}^+]^3 \exp((\gamma-1)\zeta) \right)}{1 + D_{\text{NaCa}} \left( [\text{Ca}_{\text{cyt}}^{2+}][\text{Na}_{\text{ext}}^+]^3 - [\text{Ca}_{\text{ext}}^{2+}][\text{Na}_{\text{cyt}}^+]^3 \right)}$ |                                                                       |      | [8-11] |
| $r_{\text{NaCa}} = \text{total Ca}^{2+} \text{ flux}, r_o = \text{nominal flux gradient}, m_{\text{GHK}} = \text{electro-chemical flux across NCX}, \text{ and } m_{\text{chemical}} = \text{chemical gradient}$ $K_{\text{PKCmod}} = 0.5, K_{\text{PKC}} = 10, D_{\text{PKC}} = 2, k_m = 2, \text{NaCa}_{\text{act}} = 0.2$ $\gamma = 0.5, \zeta = \frac{zV_m F}{RT}, z = 2, F = 96500 \text{ C mol}^{-1}, T = 310 \text{ K}, R = 8314 \text{ J kg}^{-1} \text{ mol}^{-1} \text{ K}^{-1}, D_{\text{NaCa}} = 0.05 \text{ nM}^{-4}$ |                                                                                                                                                                                                                                                                                                                                                                                                                                                                                                                                                                                                                                                                                                                                                                                                                         |                                                                       |      |        |

cyt – cytosolic; seq – sequestered; ext – extracellular; and  $V_m$  – membrane potential

Table S3: Equations for the voltage dependence and kinetic current for brainstem neurons.

| Current    | Expression                                                           | Ref.                                                                                                                                                   |        |
|------------|----------------------------------------------------------------------|--------------------------------------------------------------------------------------------------------------------------------------------------------|--------|
| $I_{Na}$   | $m_{\infty Na}$                                                      | $\frac{0.091 \cdot (V + 38)/(1 - \exp(-(V + 38)/5))}{0.091 \cdot (V + 38)/(1 - \exp(-(V + 38)/5)) + 0.062 \cdot (V + 38)/(\exp((V + 38)/5) - 1)}$      | [3]    |
|            | $\bar{g}_{Na} \cdot m_{Na}^3 \cdot h_{Na} \cdot (E_{Na} - V)$        | $\tau_{mNa} \cdot (1/(0.091 \cdot (V + 38)))/(1 - \exp(-(V + 38)/5)) + 0.062 \cdot (V + 38)/(\exp((V + 38)/5) - 1)$                                    |        |
|            | $h_{\infty Na}$                                                      | $\frac{0.016 \cdot \exp(-(V + 55)/15)}{0.016 \cdot \exp(-(V + 55)/15) + 2.07/(1 + \exp(-(V - 17)/21))}$                                                |        |
|            | $\tau_{hNa}$                                                         | $1/(0.016 \cdot \exp(-(V + 55)/15)) + 2.07/(1 + \exp(-(V - 17)/21))$                                                                                   |        |
| $I_{KDR}$  | $\bar{g}_{KDR} \cdot m_{KDR}^4 \cdot (E_K - V)$                      | $m_{\infty KDR} \cdot (1 + \exp((V_{12} - V)/k))^{-4}$                                                                                                 | [1]    |
|            |                                                                      | $\tau_{mKDR} \cdot \frac{1}{4} \cdot (1/(\exp((V - 81)/25.6)) + \exp((-V + 132)/18)) + 9.9$                                                            |        |
| $I_{KA}$   | $m_{\infty KA}$                                                      | $1/(1 + \exp(V + 36/20))$                                                                                                                              | [3]    |
|            | $\bar{g}_{KA} \cdot 0.4 \cdot m_{KA}^4 \cdot h_{KA} \cdot (E_K - V)$ | $\tau_{mKA} \cdot 1/(\exp(V + 35.82)/19.69) + \exp(-V + 79.69)/12.7 + 0.37$                                                                            |        |
|            | $h_{\infty KA}$                                                      | $1/(1 + \exp(V + 78/6))$                                                                                                                               |        |
|            | $\tau_{hKA}$                                                         | $1/(\exp(V + 46.05)/5) + \exp(-V + 238.4)/37.45$ if $V < -63$ , else $\tau_{hKA} = 60.0$                                                               |        |
| $I_{KAHP}$ | $\bar{g}_{KAHP} \cdot m_{KAHP}^2 \cdot (E_K - V)$                    | $m_{\infty KAHP} \cdot \frac{1.25 \cdot 10^{-8} [Ca_{cyt}^{+2}]^2}{(1.25 \cdot 10^{-8} [Ca_{cyt}^{+2}]^2) + 2.5}$                                      | [3, 8] |
|            |                                                                      | $\tau_{mKAHP} \cdot 1000/((1.25 \cdot 10^{-8} [Ca_{cyt}^{+2}]^2) + 2.5)$                                                                               |        |
| $I_{CaL}$  | $\bar{g}_{CaL} \cdot m_{CaL}^2 \cdot (E_{Ca} - V)$                   | $m_{\infty CaL} \cdot \frac{1.6/(\exp(-0.072 \cdot (V - 5)))}{1.6/(\exp(-0.072 \cdot (V - 5))) + (0.02 \cdot (V - 1.31)/(\exp((V - 1.31)/5.36) - 1))}$ | [3]    |
|            |                                                                      | $\tau_{mCaL} \cdot 1/(1.6/(\exp(-0.072 \cdot (V - 5))) + (0.02 \cdot (V - 1.31)/(\exp((V - 1.31)/5.36) - 1)))$                                         |        |
| $I_{leak}$ | $g_{leak} \cdot (E_{leak} - V)$                                      | -                                                                                                                                                      | [3]    |

$$\frac{dV_m}{dt} = \frac{1}{C_m} \cdot (I_{Na} + I_{KDR} + I_{KA} + I_{KAHP} + I_{CaL} + I_{leak})$$

Note that  $Ca_{cyt}^{+2}$  used in this Table is different from the cytosolic  $Ca^{+2}$  in Table S2. See first subsection of the Results for details.  
 $I_{Na}$  - Fast sodium current,  $I_{KDR}$  - Delayed rectifier potassium current,  $I_{KA}$  - Fast activating potassium current  
 $I_{KAHP}$  - Hyperpolarized calcium dependent potassium current,  $I_{CaL}$  - High threshold calcium current

Table S4: Model of phosphorylation of ion-channels through intermediate kinetics.

| Reaction                                                                                           | Rates                                                             | Parameters                                 |
|----------------------------------------------------------------------------------------------------|-------------------------------------------------------------------|--------------------------------------------|
| $K_U + 4 PKC \xrightleftharpoons[k_{dp,PKC}]{k_{p,PKC}} K_{PKC} + 4 PKC$                           | $k_{p,PKC}[K_U][PKC]^4 - k_{dp,PKC}[K_{PKC}]$                     | $k_{p,PKC} = 10; k_{dp,PKC} = 0.7312$      |
| $K_U + 4 CaMKII \xrightleftharpoons[k_{dp,CaMKII}]{k_{p,CaMKII}} K_{CaMKII} + 4 CaMKII$            | $k_{p,CaMKII}[K_U][CaMKII]^4 - k_{dp,CaMKII}[K_{CaMKII}]$         | $k_{p,CaMKII} = 1; k_{dp,CaMKII} = 3.3215$ |
| $K_{CaMKII} + 4 CaMKII \xrightleftharpoons[k_{dp,CaMKII}]{k_{p,CaMKII}} K_{PKC,CaMKII} + 4 CaMKII$ | $k_{p,CaMKII}[K_{PKC}][CaMKII]^4 - k_{dp,CaMKII}[K_{PKC,CaMKII}]$ | $k_{p,CaMKII} = 1; k_{dp,CaMKII} = 3.3215$ |
| $K_{PKC} + 4 PKC \xrightleftharpoons[k_{dp,PKC}]{k_{p,PKC}} K_{PKC,CaMKII} + 4 PKC$                | $k_{p,PKC}[K_{CaMKII}][PKC]^4 - k_{dp,PKC}[K_{PKC,CaMKII}]$       | $k_{p,PKC} = 10; k_{dp,PKC} = 0.7312$      |

$K_U$  - Unphosphorylated potassium ion-channels ( $K_{DR}$ ),  $K_{PKC}$ ,  $K_{CaMKII}$  and  $K_{PKC,CaMKII}$  - phosphorylated potassium ion-channels ( $K_{DR}$ )

Table S5: **Hill function models of signaling responses to AngII. Peak and steady state responses were separately normalized and fitted as functions of AngII concentration. Value pairs refer to the peak parameter value followed by the steady state parameter value.**

|        | Low $\text{Ca}^{2+}$ |            | High $\text{Ca}^{2+}$ |            |
|--------|----------------------|------------|-----------------------|------------|
|        | $K_{0.5}$ (nM)       | nH         | $K_{0.5}$ (nM)        | nH         |
| PLC    | 4.8, 5.51            | 1.06, 1.21 | 4.2, 4.3              | 1.04, 1.04 |
| IP3    | 11.1, 9.3            | 1.06, 1.11 | 9.9, 9.9              | 1.08, 1.08 |
| PKC    | 3.4, 3.3             | 1.07, 1.37 | 3.8, 3.8              | 1.03, 1.03 |
| CaMKII | 12.6, 12.6           | 1.59, 1.59 | 2.4, 2.4              | 1.51, 1.52 |

Table S6: **Hill function models of excitability responses to AngII. Peak and steady state responses were separately normalized and fitted as functions of AngII concentration. Value pairs refer to the peak parameter value followed by the steady state parameter value.**

| Phenotype            | $K_{0.5}$ (nM) | nH         |
|----------------------|----------------|------------|
| Wildtype             | 25.6, 26.4     | 1.55, 1.53 |
| Blocking PKC site    | 7.8, 6.3       | 1.09, 1.24 |
| Blocking CaMKII site | 4.1, 4.3       | 1.16, 1.50 |

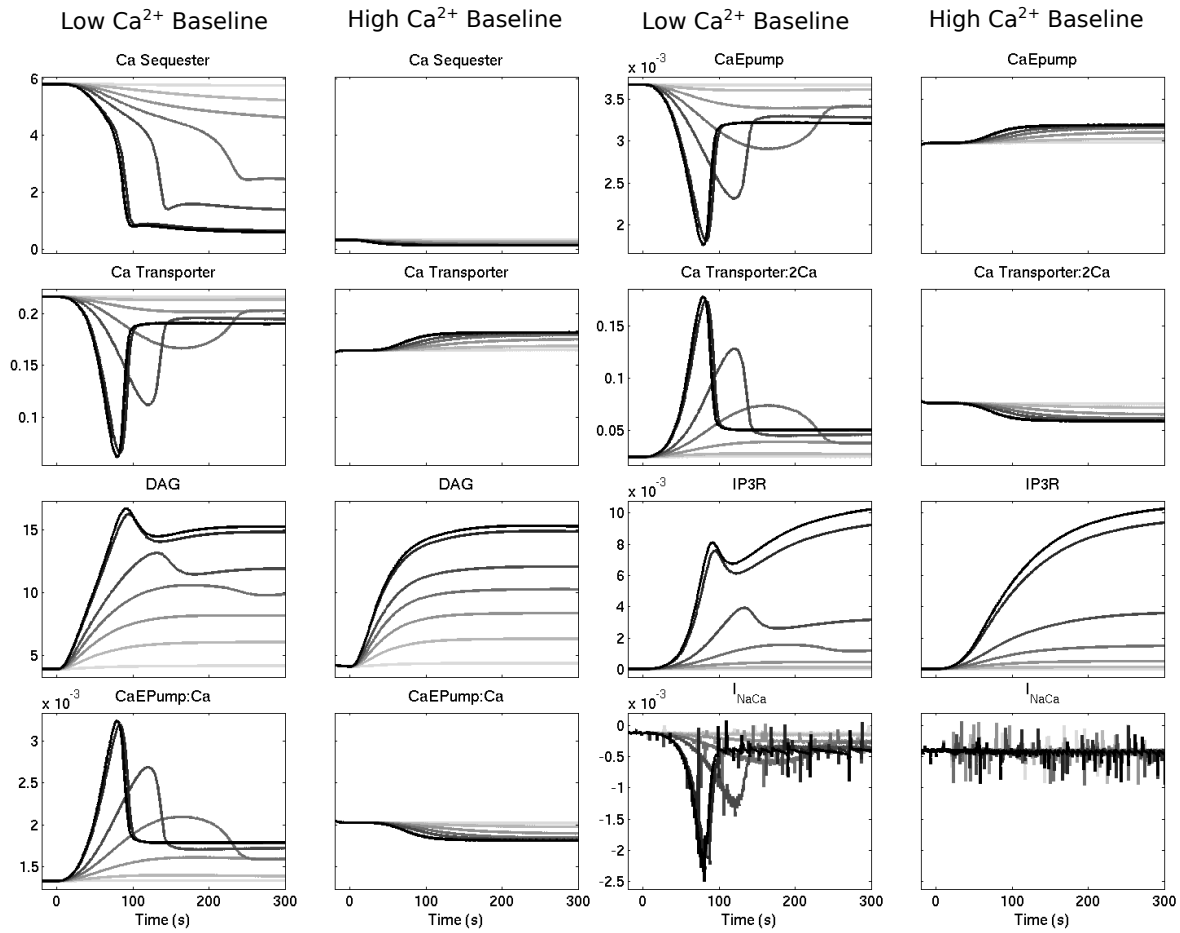

Figure S1: **Additional plots to Figure 2 of AngII elicited responses to different  $\text{Ca}^{2+}$  baseline conditions.** Low  $\text{Ca}^{2+}$  baseline and high  $\text{Ca}^{2+}$  baseline response plots to different doses of AngII for sequestered  $\text{Ca}^{2+}$ , CaTranp, DAG, CaEpump:Ca, CaEpump, CaTranp:2Ca, IP3R (IP3-bound IP3R) and NCX current ( $I_{\text{NaCa}}$ ).



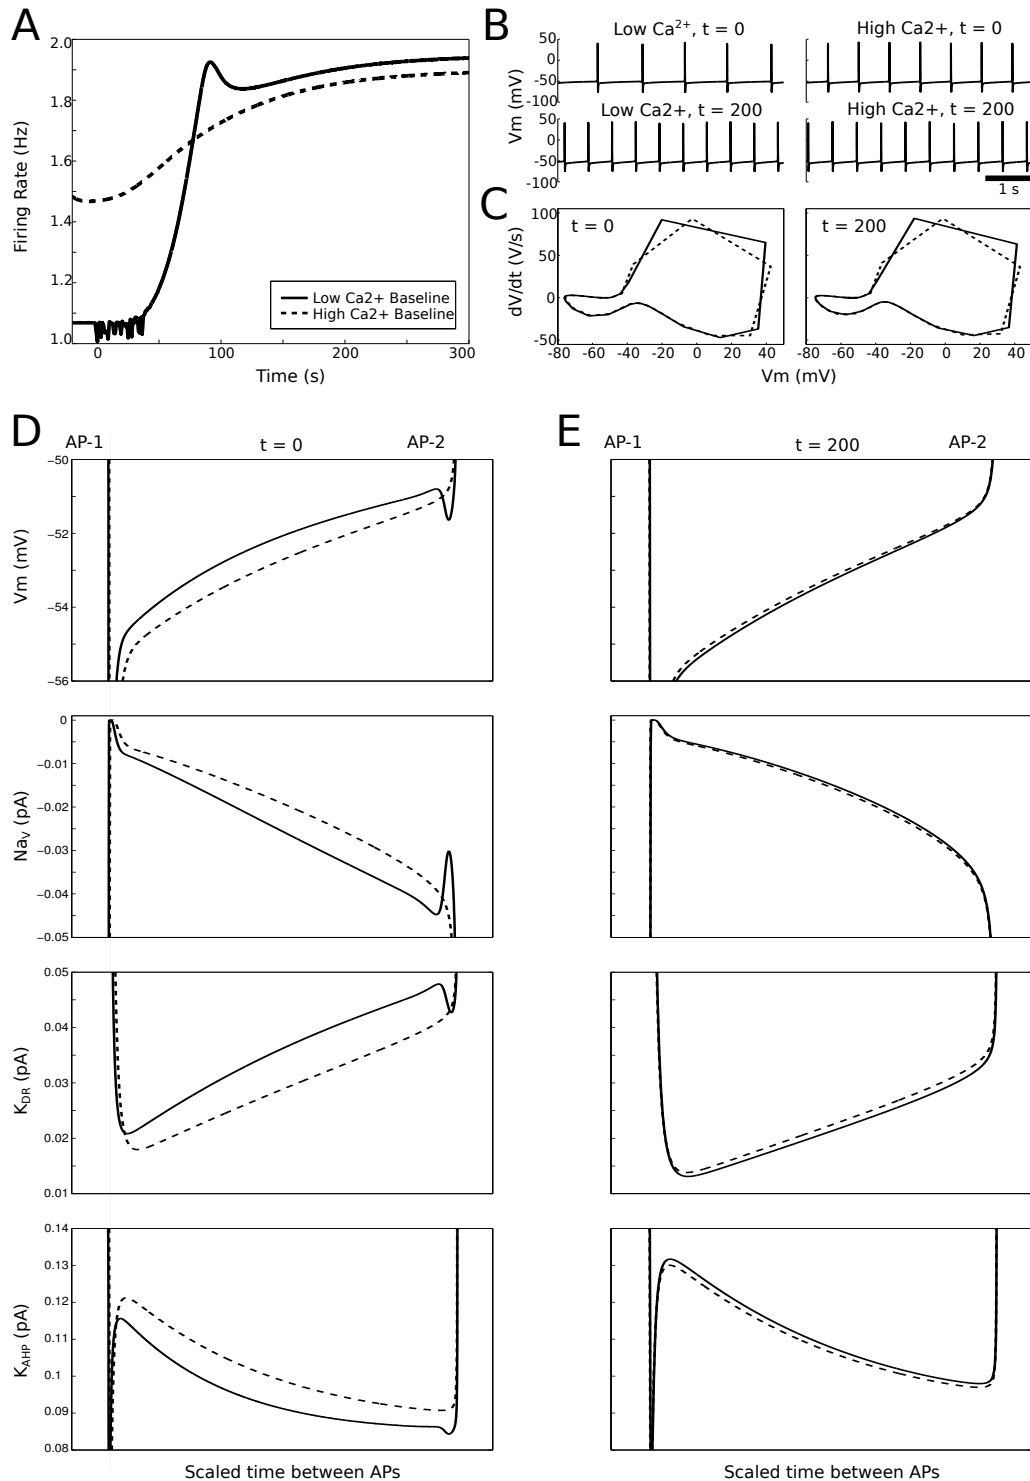

Figure S2: **Low  $\text{Ca}^{2+}$  baseline neuronal state exhibits a larger increase in AngII-induced excitability.** (A) Firing rate responses to AngII (100 nM at  $t = 0$  s) are shown for low and high  $\text{Ca}^{2+}$  baseline levels. (B) Membrane potential waveforms are shown before ( $t = 0$  s) and after ( $t = 200$  s) AngII effects have stabilized. (C) Phase-space representations of APs before and after AngII (same legend as in panel A). (D) Biophysical differences between the low and high  $\text{Ca}^{2+}$  baseline conditions (same legend as in panel A). All data are plotted during normalized time intervals between two APs (AP-1 and AP-2) to show the inter-spike interval properties either before (left,  $t = 0$  s) or after (right,  $t = 200$  s) AngII stimulation. Abbreviations:  $V_m$  = membrane potential,  $\text{Na}_V$  =  $\text{Na}^+$  current,  $K_{DR}$  =  $K_{DR}$  current,  $K_{AHP}$  =  $K_{AHP}$  current.

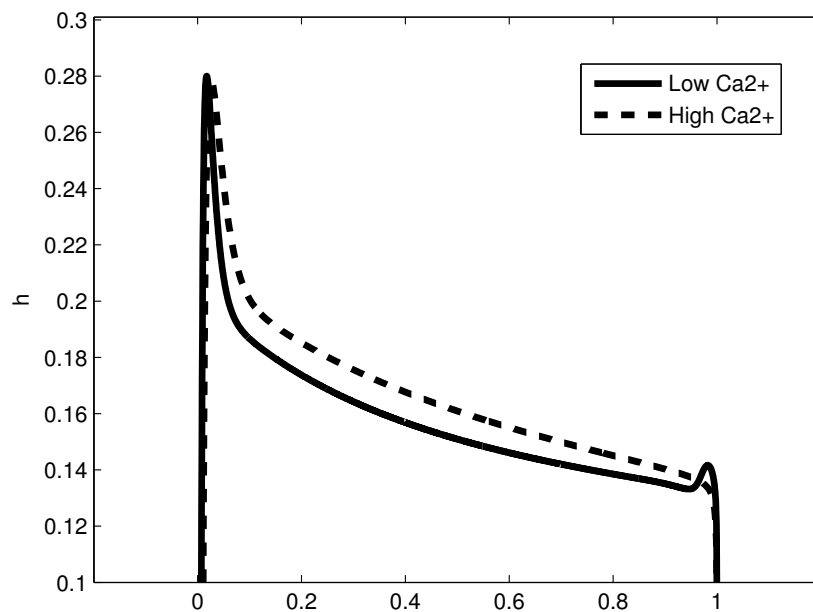

Figure S3: **Inactivation variable ( $h$ ) for  $\text{Na}^+$  channel at steady state for high and low  $\text{Ca}^{2+}$  baseline states.** Normalized time between two action potentials is represented as 0 to 1 on  $x$ -axis.

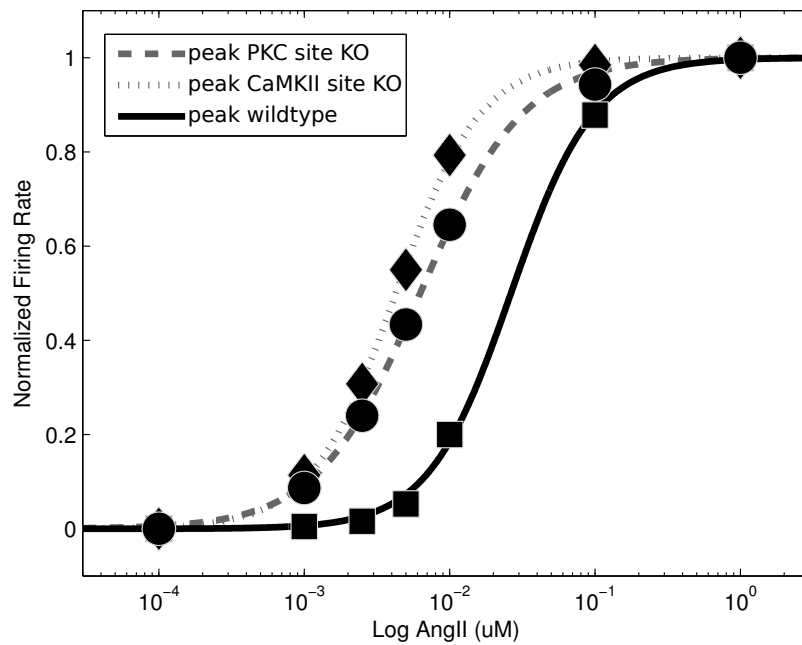

Figure S4: **Peak dose response curves for different blocking conditions of kinases.**

## Supporting References

- [1] J Huguenard and D Prince. Slow inactivation of a TEA-sensitive K current in acutely isolated rat thalamic relay neurons. *Journal of neurophysiology*, 66(4):1316–1328, 1991.
- [2] C Gelband, J Warth, H Mason, M Zhu, J Moore, J Kenyon, B Horowitz, and C Summers. Angiotensin II type 1 receptor-mediated inhibition of K<sup>+</sup> channel subunit kv2.2 in brain stem and hypothalamic neurons. *Circulation research*, 84(3):352–359, 1999.
- [3] I Rybak, J Paton, and J Schwaber. Modeling neural mechanisms for genesis of respiratory rhythm and pattern. i. models of respiratory neurons. *Journal of neurophysiology*, 77(4):1994–2006, 1997.
- [4] J Mishra and U Bhalla. Simulations of inositol phosphate metabolism and its interaction with InsP<sub>3</sub>-Mediated calcium release. *Biophysical Journal*, 83(3):1298–1316, 2002.
- [5] R Ouali, M Berthelon, M Bégeot, and J Saez. Angiotensin II receptor subtypes AT1 and AT2 are down-regulated by angiotensin II through AT1 receptor by different mechanisms. *Endocrinology*, 138(2):725–733, 1997.
- [6] H Yang, D Lu, G Vinson, and M Raizada. Involvement of MAP kinase in angiotensin II-induced phosphorylation and intracellular targeting of neuronal AT1 receptors. *The Journal of Neuroscience*, 17(5):1660–1669, 1997.
- [7] S Pan, M Zhu, M Raizada, C Summers, and C Gelband. ANG II-mediated inhibition of neuronal delayed rectifier K<sup>+</sup> current: role of protein kinase C- $\alpha$ . *American journal of physiology. Cell physiology*, 281(1):C17–23, 2001.
- [8] A Athanasiades, Jr Clark, J, F Ghorbel, and A Bidani. An ionic current model for medullary respiratory neurons. *Journal of computational neuroscience*, 9(3):237–257, 2000.
- [9] T Iwamoto, S Wakabayashi, and M Shigekawa. Growth factor-induced phosphorylation and activation of aortic smooth muscle Na<sup>+</sup>/Ca<sup>2+</sup> exchanger. *The Journal of biological chemistry*, 270(15):8996–9001, 1995.
- [10] T Iwamoto, T Watano, and M Shigekawa. A novel isothiourea derivative selectively inhibits the reverse mode of Na<sup>+</sup>/Ca<sup>2+</sup> exchange in cells expressing NCX1. *Journal of Biological Chemistry*, 271(37):22391–22397, 1996.
- [11] K Philipson, D Nicoll, M Ottolia, B Quednau, H Reuter, S John, and Z Qiu. The Na<sup>+</sup>/Ca<sup>2+</sup> exchange molecule: an overview. *Annals of the New York Academy of Sciences*, 976:1–10, 2002.
- [12] M Zhu, C Gelband, P Posner, and C Summers. Angiotensin II decreases neuronal delayed rectifier potassium current: role of calcium/calmodulin-dependent protein kinase II. *Journal of neurophysiology*, 82(3):1560–1568, 1999.
- [13] D Wang, C Summers, P Posner, and C Gelband. A-type K<sup>+</sup> current in neurons cultured from neonatal rat hypothalamus and brain stem: modulation by angiotensin II. *Journal of neurophysiology*, 78(2):1021–1029, 1997.
