# Supplementary material
Source: PubMed Central journal article supplement (PMC4286605)
Supplement: mmc2.pdf [file mmc2.pdf]

## Article

# Multiscale Model of Dynamic Neuromodulation Integrating Neuropeptide-Induced Signaling Pathway Activity with Membrane Electrophysiology

Hirenkumar K. Makadia,<sup>1</sup> Warren D. Anderson,<sup>1,2</sup> Dirk Fey,<sup>3</sup> Thomas Sauter,<sup>4</sup> James S. Schwaber,<sup>1,2</sup> and Rajanikanth Vadigepalli<sup>1,2,\*</sup>

<sup>1</sup>Daniel Baugh Institute for Functional Genomics and Computational Biology, Department of Pathology, Anatomy and Cell Biology, Sidney Kimmel Medical College and <sup>2</sup>Graduate Program in Neuroscience, Thomas Jefferson University, Philadelphia, Pennsylvania; <sup>3</sup>Systems Biology Ireland, University College Dublin, Dublin, Ireland; and <sup>4</sup>Life Sciences Research Unit, University of Luxembourg, Walferdange, Luxembourg

**ABSTRACT** We developed a multiscale model to bridge neuropeptide receptor-activated signaling pathway activity with membrane electrophysiology. Typically, the neuromodulation of biochemical signaling and biophysics have been investigated separately in modeling studies. We studied the effects of Angiotensin II (AngII) on neuronal excitability changes mediated by signaling dynamics and downstream phosphorylation of ion channels. Experiments have shown that AngII binding to the AngII receptor type-1 elicits baseline-dependent regulation of cytosolic  $\text{Ca}^{2+}$  signaling. Our model simulations revealed a baseline  $\text{Ca}^{2+}$ -dependent response to AngII receptor type-1 activation by AngII. Consistent with experimental observations, AngII evoked a rise in  $\text{Ca}^{2+}$  when starting at a low baseline  $\text{Ca}^{2+}$  level, and a decrease in  $\text{Ca}^{2+}$  when starting at a higher baseline. Our analysis predicted that the kinetics of  $\text{Ca}^{2+}$  transport into the endoplasmic reticulum play a critical role in shaping the  $\text{Ca}^{2+}$  response. The  $\text{Ca}^{2+}$  baseline also influenced the AngII-induced excitability changes such that lower  $\text{Ca}^{2+}$  levels were associated with a larger firing rate increase. We examined the relative contributions of signaling kinases protein kinase C and  $\text{Ca}^{2+}$ /Calmodulin-dependent protein kinase II to AngII-mediated excitability changes by simulating activity blockade individually and in combination. We found that protein kinase C selectively controlled firing rate adaptation whereas  $\text{Ca}^{2+}$ /Calmodulin-dependent protein kinase II induced a delayed effect on the firing rate increase. We tested whether signaling kinetics were necessary for the dynamic effects of AngII on excitability by simulating three scenarios of AngII-mediated  $\text{K}_{\text{DR}}$  channel phosphorylation: (1), an increased steady state; (2), a step-change increase; and (3), dynamic modulation. Our results revealed that the kinetics emerging from neuromodulatory activation of the signaling network were required to account for the dynamical changes in excitability. In summary, our integrated multiscale model provides, to our knowledge, a new approach for quantitative investigation of neuromodulatory effects on signaling and electrophysiology.

## INTRODUCTION

Neuromodulators are integral to the control of intrinsic neuronal excitability, synaptic integration, and neural network function (1–3). Neuromodulators typically interact with specific G protein-coupled receptors (GPCRs) to activate biochemical signaling pathways and alter the metabolism, transcriptional activity, and electrophysiological responsiveness of the postsynaptic cell (4–7). However, the biochemical signaling and electrophysiological responses to neuromodulators have typically been examined separately in computational studies (8). The integration of signaling with electrophysiology in computational models of nonneuronal excitable cells has yielded important mechanistic insights to the diverse fields including cardiovascular physiology (9,10), platelet biology (11), and insulin metabolism (12,13). Our objective for this study was to integrate

computational models of signaling pathway activation with those of electrophysiology to study the mechanistic underpinnings of neuromodulation.

We investigated neuromodulatory mechanisms of intracellular signaling and excitability responses to Angiotensin II (AngII) in brainstem neurons. AngII is a peptide neuromodulator involved in the regulation of autonomic nervous system activity via its actions within central autonomic nuclei (6,14–18). Neuromodulatory effects of AngII are primarily stimulated by the binding of AngII to the type-1 angiotensin receptor (AT1R) and by eliciting G-protein mediated pathways (19). In brainstem autonomic neurons, AngII influences the inotropic and chronotropic drive of the heart (20,21). Neurons in autonomic nuclei such as the nucleus of the solitary tract participate in control of cardiovascular regulation at a beat-to-beat timescale and at the level of long-term arterial pressure setpoint control (22). Importantly, aberrations of AngII signaling in the brainstem have been implicated in the pathology underlying neurogenic hypertension (23–26). Thus, deciphering the mechanisms of AngII-mediated regulation of neuronal state is central to our understanding of cardiovascular homeostasis and diseases thereof.

Submitted August 29, 2014, and accepted for publication November 11, 2014.

\*Correspondence: [rajanikanth.vadigepalli@jefferson.edu](mailto:rajanikanth.vadigepalli@jefferson.edu)

Hirenkumar K. Makadia, Warren D. Anderson, and Dirk Fey contributed equally to this work.

Editor: Reka Albert.

© 2015 by the Biophysical Society  
0006-3495/15/01/0211/13 \$2.00

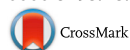

Studies of AngII-mediated changes in cytosolic  $\text{Ca}^{2+}$  levels have shown contrasting effects of AT1R activation on intracellular  $\text{Ca}^{2+}$  levels, in which both stimulatory and suppressive effects have been reported (27–29). In cultured rat stellate ganglion neurons, it has been demonstrated that this divergence in  $\text{Ca}^{2+}$  responses was related to the  $\text{Ca}^{2+}$  baseline level. Suppressing effects were found in neurons with higher  $\text{Ca}^{2+}$  baseline levels and stimulatory effects were observed in neurons with relatively lower  $\text{Ca}^{2+}$  baseline levels (27). However, the mechanisms underlying such divergent  $\text{Ca}^{2+}$  baseline-dependent responses to AngII have not been elucidated. Similarly, it is unclear how this baseline-dependent regulation impacts neuronal excitability. Concomitant with the fluctuations of intracellular  $\text{Ca}^{2+}$  levels, application of AngII to cultured brainstem neurons in vitro results in an AT1R-dependent increase in action-potential (AP) firing rate (30–34). Electrophysiological studies have shown that AngII-stimulated protein kinase C (PKC) and  $\text{Ca}^{2+}$ /Calmodulin-dependent protein kinase II (CaMKII) activation leads to the phosphorylation of delayed rectifier potassium ( $\text{K}_{\text{DR}}$ ) channels, which results in decreased channel conductance and increased firing rate (35–39). The relative contributions of PKC and CaMKII to firing rate response dynamics have not been studied. Our study addresses mechanistic questions regarding the biochemical basis for divergent  $\text{Ca}^{2+}$  responses and the molecular contributions to the biophysical consequences of AngII stimulation.

The effects of AngII-mediated neuromodulation result from nonlinear interactions involving numerous elements, thus necessitating a computational approach to unravel the dynamic mechanisms (40,41). We employed a multiscale modeling approach to quantitatively study AngII-mediated neuromodulation (42–44). We developed an integrated model to bridge GPCR signaling (19) with membrane electrophysiology (45) through an apparently new biochemical model of ion channel phosphorylation. We examined the molecular contributions to the dynamics of neuromodulation through targeted in silico manipulations. Our model incorporated AngII stimulation via Gq receptor activation of the signaling network. Bridging temporal scales from signaling (10 s) to electrophysiology ( $10^{-3}$  s) enabled us to investigate AngII/AT1R-mediated effects upon the following: 1) intracellular  $\text{Ca}^{2+}$  dynamics; 2) PKC and CaMKII activity and their distinct contributions to downstream neuronal firing; and 3) contributions of dynamic ion channel phosphorylation to firing rate modulation.

Our results revealed that controlling the rate of  $\text{Ca}^{2+}$  transport to endoplasmic reticulum (ER) generated the dichotomy in  $\text{Ca}^{2+}$  baseline-dependent responses. Examining relative contributions of PKC and CaMKII to excitability changes showed nonlinear interactions among distinct kinase contributions to the dynamics of AngII-mediated neuromodulation. We investigated the importance of dynamic AngII-mediated  $\text{K}_{\text{DR}}$  channel phosphorylation by simulating multiple scenarios of altering  $\text{K}_{\text{DR}}$  channel conductance. We

found that the kinetics of channel phosphorylation were necessary for capturing the dynamics of neuronal excitability. To our knowledge, our multiscale modeling study provides a novel approach to quantitatively investigate the AngII neuromodulatory effects on signaling and electrophysiology, and revealed putative mechanisms underlying the regulation of  $\text{Ca}^{2+}$  responses,  $\text{K}_{\text{DR}}$  conductance, and neuronal excitability. Understanding the dynamical interactions associated with AngII effects on different  $\text{Ca}^{2+}$  baseline states and elucidating the differential modulatory effects of kinases on neuronal properties have larger impact in understanding physiology of blood pressure control and pathophysiology of hypertension development (34,46,47).

## MATERIALS AND METHODS

An integrated model of neuronal cell signaling and electrophysiology was implemented as a set of ordinary differential equations solved using the ODE15s solver in the software MATLAB (The MathWorks, Natick, MA). The signaling reactions were modeled with either mass-action or Michaelis-Menten kinetics and ion channel electrophysiology was modeled according to the Hodgkin-Huxley formalism. These models were initially validated against their respective data domains independently and were then integrated to develop a multiscale model of signaling and electrophysiology. The model code in MATLAB format and instructions to reproduce the key results are available through accession No. 156830 in the ModelDB resource (48) at <http://senselab.med.yale.edu/ModelDB/ShowModel.asp?model=156830>.

### Modeling AngII-mediated signaling network dynamics

AngII-activated AT1R stimulates phospholipase C ( $\text{PLC}\beta$ ) and triggers phosphoinositide (IP) hydrolysis, which releases  $\text{IP}_3$  and DAG, followed by  $\text{Ca}^{2+}$  mobilization from internal stores and activation of  $\text{Ca}^{2+}$ -dependent enzymes including PKC and CaMKII (6). To construct a model of the AngII-mediated signaling network, we started with reaction pathways from an established cellular signaling database (DOQCS, [doqcs.ncbs.res.in](http://doqcs.ncbs.res.in), accession No. 31). We employed a model of GPCR-mediated  $\text{PLC}\beta$  activation,  $\text{IP}_3$  metabolism,  $\text{Ca}^{2+}$  release by the  $\text{IP}_3$  receptor ( $\text{IP}_3\text{R}$ ) in ER, and activation of signaling kinases PKC and CaMKII (19) as the basis for our biochemical model. A total of 13 signaling pathways from DOQCS were merged to build the AngII-mediated signaling network (see Table S1 in the Supporting Material). Our integrated model is comprised of 13 signaling pathways, a biochemical model of ion-channel phosphorylation, and an electrophysiological model containing six ion channels. A schematic of the integrated model topology including signaling network is shown in Fig. 1 A.

We modified the initially collated signaling network in three distinct ways:

1. The DOQCS model of Gq pathway activation was based on metabotropic glutamate receptor (mGluR) signaling. We replaced the mGluR kinetics with those of AT1R. The forward rate constant for binding of AngII to AT1R was estimated based on experiments from Yang et al. (49). The corresponding backward reaction kinetics, obtained from Mishra and Bhalla (19), were assumed to be similar to those of mGluR. The total AT1R concentration in the model was based on Ouali et al. (50). The majority of the parameters were initially taken from the DOQCS resource, because these parameters were tuned based on brain tissue data (19).
2. We compartmentalized the  $\text{Ca}^{2+}$  dynamics in the model into three sections: the intracellular (cytosolic), the ER (sequestered), and the perimembrane space adjacent to calcium channels (extracellular). Cytosolic  $\text{Ca}^{2+}$  could be either free or buffered and the  $\text{IP}_3$  receptor regulated its

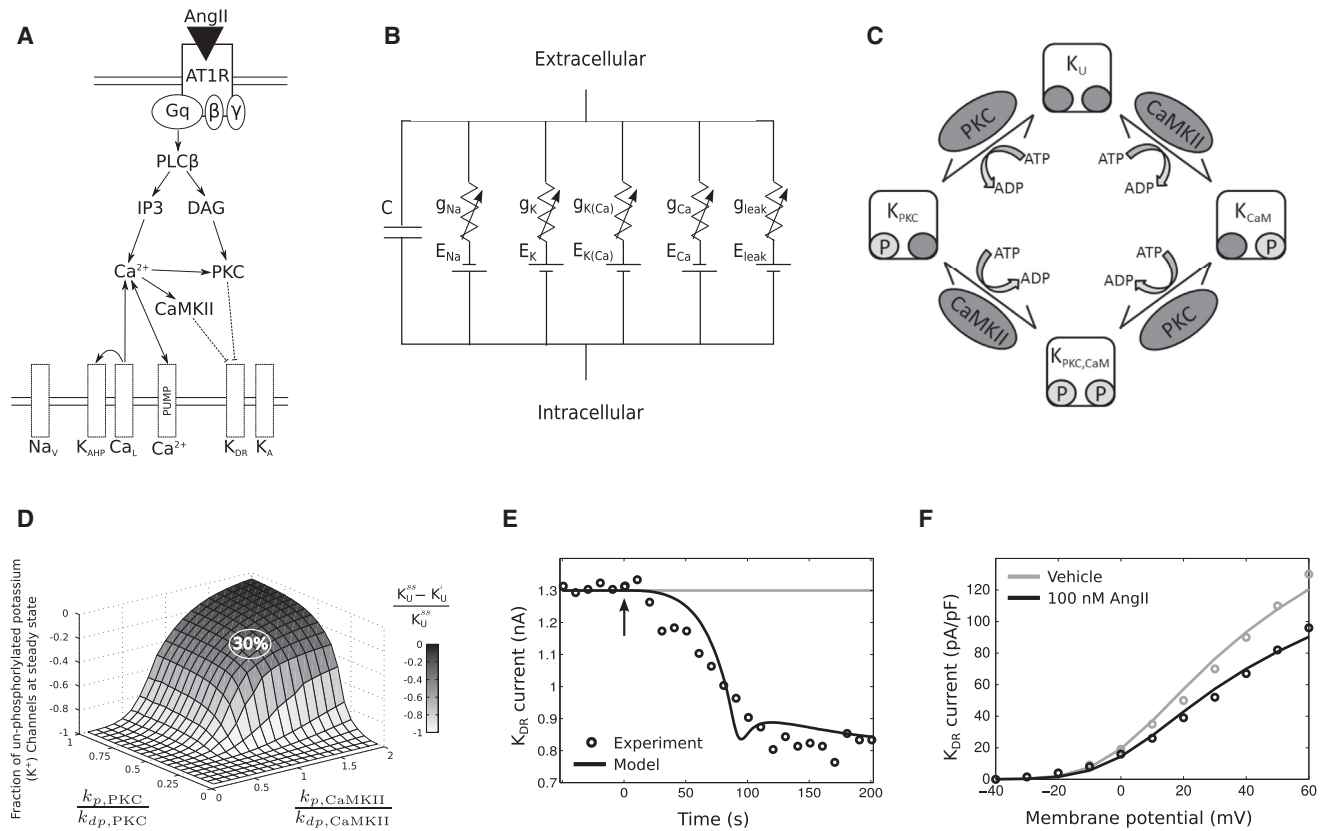

**FIGURE 1** Integrated model of the intracellular signaling and electrophysiology. (A) An overview of the integrated model topology, showing AngII activation eliciting multiple signaling pathways and subsequently modulating membrane electrophysiology. (B) Circuit diagram of the electrophysiology model. (C) Schematic depicting the phosphorylation reactions underlying the AngII-mediated reduction of  $K_{DR}$  conductance. (D) Plot showing the fractional reduction of unphosphorylated  $K_{DR}$  channels as a function of phosphorylation/dephosphorylation reaction rate ratios ( $k_p/k_{dp}$  for both PKC and CaMKII). Data correspond to simulations in which  $K_U^{ss}$  indicates the fraction of unphosphorylated  $K_{DR}$  channels after 100 nM AngII at steady state and  $K_U^i$  refers to the fraction of unphosphorylated  $K_{DR}$  channels before the application of AngII. The relative phosphorylation and dephosphorylation rates were set to yield ~30% reduction in unphosphorylated channels to fit the experimental data in (E) (see Table S4 for reaction details). (E) Model fit to dynamic  $K_{DR}$  current data after the application of 100 nM AngII to cultured brainstem neurons (37). (F) I-V relations for  $K_{DR}$  from experiments (37) and simulations under baseline conditions and after 100 nM AngII application to cultured brainstem neurons.

transport from the ER. Reaction details and parameter values for the  $Ca^{2+}$  regulation model are shown in Table S2. Parameters corresponding to nonoscillatory  $Ca^{2+}$  response were modified to match the experimental data from neurons (27,29). Table S2 also shows reactions and/or equations for all of submodules of calcium dynamics, except for the  $Ca_L$  type ion-channel, which are reported in Table S3.

3. We augmented the  $Ca^{2+}$  regulation module to include the sodium-calcium exchanger (NCX). Electrodiffusion of NCX, characterized by the influx of three  $Na^+$  ions for the efflux of every  $Ca^{2+}$  ion, was modeled based on the Goldman-Hodgkin-Katz equation (51). The chemical flux component of the exchanger was modeled with a PKC-dependent regulatory component (52,53), which also incorporated Michaelis-Menten kinetics for allosteric activation by  $Ca^{2+}$  (54) (see NCX module in Table S2 for details).

### Modeling the neuronal membrane electrical activity dynamics

Neuronal electrophysiology was modeled using a modified Hodgkin and Huxley formalism (55). We modeled an electrical circuit (Fig. 1 B) containing multiple ionic currents balanced across the membrane (see Section S2 in the Supporting Material for details). The channel conductance and current expressions for the sodium channel ( $Na^+$ ), delayed rectifier potassium

channel ( $K_{DR}$ ), A-type potassium channel ( $K_A$ ), L-type calcium channel ( $Ca_L^{2+}$ ), hyperpolarized calcium-dependent potassium channel ( $K_{AHP}$ ), and a nonspecific leak channel are described in Table S3.

The initial parameters of the electrical model were based on a model of cardiorespiratory brainstem neurons (45). The model parameters were modified to match experimental observations of increased firing rates, reduced  $K_{DR}$  currents, and increased intracellular  $Ca^{2+}$  concentration after AngII application. The following constraints were imposed on the model based on AngII experimental data:

1. The maximal conductances of the different channel types were adopted from Rybak et al. (45). This ensured a brainstem neuronal phenotype exhibiting the physiological firing rate at nominal conditions (38).
2. The steady-state activation variables of the  $K_{DR}$  and  $K_A$  currents (i.e.,  $m_{K_{DR},\infty}$  and  $m_{K_A,\infty}$  in Table S3) were chosen to provide a good fit to whole-cell, patch-clamp data (35,39).

### Modeling ion-channel phosphorylation to bridge signaling pathways and electrical activity

We considered the macroscopic conductance of  $K_{DR}$  channel as dependent on phosphorylation by PKC and CaMKII. An apparently new kinetic model was constructed based on mass action kinetics (Fig. 1 C). Experimental data

show that phosphorylation of  $K_{DR}$  channels results in a substantial reduction in current (50–90% (56)). We assumed that phosphorylated  $K_{DR}$  channels could be completely inhibited at saturating levels of channel phosphorylation (i.e.,  $g_{K_{DR}} = 0$ ). The  $K_{DR}$  conductance  $\bar{g}_{K_{DR}}$  was obtained by multiplying basal maximal conductance by the fraction of unphosphorylated channels. The phosphorylation reactions were modeled with first-order kinetics as

$$\frac{dK_P}{dt} = k_p[K_U][\text{kinase}]^n - k_{dp}[K_P], \quad (1)$$

$$K_T = K_U + K_P, \quad (2)$$

$$K_P = K_{PKC} + K_{CaMKII} + K_{PKC,CaMKII}, \quad (3)$$

where  $K_T$  represents the total fraction of potassium channels with  $n$  phosphorylation sites ( $K_T = 1$ ),  $K_U$  represents the fraction of unphosphorylated channels, and  $K_P$  represents the fraction of phosphorylated channels. The levels of phosphorylated channels represent aggregate of channels phosphorylated by PKC, CaMKII, or both. Kinases were assumed to act independently on distinct phosphorylation sites on these channels. The parameter  $n = 4$  was set for simplification under the assumption that each of the four channel subunits can be phosphorylated. In our integrated model, PKC and CaMKII both phosphorylated  $K_{DR}$  (see Table S4 for details).

To simulate phosphorylation-mediated reduction of  $K_{DR}$  current, we weighted the peak conductance by the fraction of unphosphorylated channels in Table S3 ( $K_U = 1$  before AngII stimulation):

$$I_{K_{DR}}(V) = K_U \cdot \bar{g}_{K_{DR}} \cdot m_{K_{DR}}^4 (V - E_K). \quad (4)$$

To occlude the phosphorylation reactions of a kinase in silico, we set  $k_{p,CaMKII}$  and/or  $k_{p,PKC}$  in Table S4 to zero.

## RESULTS

### Bridging the signaling network with the electrophysiology model

Bidirectional interactions between the signaling and electrophysiological domains arise due to kinases PKC and CaMKII phosphorylating the  $K_{DR}$  channel, the dependence of NCX on membrane potential, the contribution of voltage-dependent  $Ca^{2+}$  channels to  $Ca^{2+}$  regulation, and the effects of  $Ca^{2+}$  level on  $Ca^{2+}$ -dependent potassium channel conductance ( $K_{AHP}$ ). The signaling network model was modified to incorporate the membrane potential as a dynamic state variable in the NCX description. The maximal conductance of  $K_{DR}$  was dependent on the state variables corresponding to active PKC and CaMKII as detailed above. The remaining key interactions involved  $Ca^{2+}$  dynamics due to release from cytosolic stores in the signaling model and flux through ion channel currents in the electrical model.

Simulations indicated that the  $Ca^{2+}$  levels affecting  $K_{AHP}$  had to be considered separately from the levels of free cytosolic  $Ca^{2+}$ . Otherwise, large increase in cytosolic  $Ca^{2+}$  levels after AngII stimulation activated the  $K_{AHP}$  current to saturation and prevented any neuronal firing activity. The hypothesis that there exists a perimembrane  $Ca^{2+}$  compartment distinct from bulk cytosolic  $Ca^{2+}$  is supported by experimental data (57) and is typically considered as

such in neuronal modeling studies (58). To address this issue,  $Ca^{2+}$  dynamics were compartmentalized in the model such that the  $K_{AHP}$  and  $Ca_L$  channels were assumed to be closely situated with local  $Ca^{2+}$  buffering and were uninfluenced by bulk cytosolic  $Ca^{2+}$ .

### Integrated AngII signaling and electrophysiology model accounts for the dynamics of $K_{DR}$ channel phosphorylation

Our integrated model quantitatively simulated AngII/AT1R-mediated neuromodulation by recapitulating experimental findings from brainstem neurons. To fit the electrophysiological data with that of signaling network interactions, we varied the ratio of ( $K_{DR}$ ) phosphorylation to dephosphorylation rate constants ( $k_p/k_{dp}$ ) for PKC and CaMKII (Fig. 1 D). The model was calibrated to account for the 30% reduction in  $K_{DR}$  current observed after application of 100 nM AngII (37). Evidence suggests that this current reduction is attributable to  $K_{DR}$  channel phosphorylation (37). We then tuned the  $k_p$  and  $k_{dp}$  parameters for PKC and CaMKII to render a 30% reduction in the fraction of unphosphorylated  $K_{DR}$  channels. This calibration recapitulated the kinetics of  $K_{DR}$  current reduction after the application of 100 nM AngII (Fig. 1 E), as well as the shift in the  $K_{DR}$  current-voltage relation observed in voltage-clamp data (Fig. 1 F) (37). Our results showed that the combined effects of PKC and CaMKII were required to attain the experimental results. The fitted CaMKII rate constants were equal for phosphorylation and dephosphorylation, and the PKC dephosphorylation rate constant was twice that of the PKC phosphorylation rate constant. Our integrated model with known signaling network interactions, when appropriately tuned with channel phosphorylation kinetics, accounted for the experimentally observed dynamics of excitability changes in response to AngII stimulation.

### $Ca^{2+}$ baseline-dependent bifurcation of signaling responses to AngII

AngII application resulted in a dose-dependent AT1R-signaling pathway response, including regulation of PKC and CaMKII by  $Ca^{2+}$ . Cytosolic  $Ca^{2+}$  levels in neurons are maintained by chemical and electrochemical fluxes due to L-type  $Ca^{2+}$  channels ( $Ca_L$ ), the sodium-calcium exchanger (NCX), and plasma membrane  $Ca^{2+}$  pumps (EPump) (see Fig. 2 A). Excess intracellular  $Ca^{2+}$  is stored in the ER until the buffer reaches its saturating limit, and is released after IP<sub>3</sub>R binding. Experimental observations have shown that AngII elicits divergent neuronal responses depending on  $Ca^{2+}$  baseline levels (see insets in Fig. 2, D and F) (27). To determine why such divergent responses occur, we individually varied all of the parameters in the  $Ca^{2+}$  regulation module to search for variations that could reproduce this



nonlinear behavior. We found that reducing the rate of  $\text{Ca}^{2+}$  transport into the ER ( $k_{\text{ER}}^{\text{Ca}^{2+}}$ ) increased the cytosolic  $\text{Ca}^{2+}$  baseline levels at steady state without AngII (Fig. 2 B), thus instantiating the high baseline  $\text{Ca}^{2+}$  condition. Reduction in this rate constant (from 3600 to  $36 \mu\text{M}^{-2} \text{s}^{-1}$ ) initiates an efflux of all stored  $\text{Ca}^{2+}$  from the ER to the cytosol. This efflux resulted in an empty ER buffer in the high  $\text{Ca}^{2+}$  baseline condition (Fig. 2 C). This is because the decreased influx rate of  $\text{Ca}^{2+}$  into the ER induced an imbalance in  $\text{Ca}^{2+}$  flux between ER and cytosol. Because the outward rate ( $3125 \mu\text{M}^{-1} \text{s}^{-1}$ ) remained the same, the increase in rate difference (outward versus inward) introduced a driving force that favored  $\text{Ca}^{2+}$  extrusion from the ER (see Section S1 in the Supporting Material). At steady state, the ER  $\text{Ca}^{2+}$  buffer transferred all of its sequestered  $\text{Ca}^{2+}$  into the cytosolic region, resulting in an increase in the intracellular  $\text{Ca}^{2+}$  baseline level. Thus, due to a change in the amount of  $\text{Ca}^{2+}$  available in ER stored for different  $\text{Ca}^{2+}$  baseline conditions, application of AngII led to a divergence in cytosolic  $\text{Ca}^{2+}$  and buffer responses to AngII.

We applied AngII to a neuronal state that was characterized by a higher rate of  $\text{Ca}^{2+}$  transport into ER, or the corresponding low cytosolic  $\text{Ca}^{2+}$  baseline condition. Our simulations resulted in an increase in cytosolic  $\text{Ca}^{2+}$  level followed by a response adaptation. The  $\text{Ca}^{2+}$  level returned to the initial baseline state after withdrawal of AngII (Fig. 2 D). The peak  $\text{Ca}^{2+}$  response increased nonlinearly as a function of AngII dose (Fig. 2 D). The time point of the initial  $\text{Ca}^{2+}$  peak after stimulation was observed within ~45 s in stellate ganglion cells (27). Our simulation results showed an initial peak within 50–120 s and thus provided a good match to these data in terms of the observed temporal response. The absolute peak values were comparable in both experimental data sets and were matched well by the model. For AngII concentrations up to 1 nM the  $\text{Ca}^{2+}$  response was negligible, although the response increases sigmoidally for AngII >1 nM (see Fig. S2 A). The dynamics of PLC $\beta$ , IP $_3$ , PKC, and CaMKII exhibited saturating responses with distinct amplitudes and kinetics (Fig. 2 E). PLC $\beta$  and IP $_3$  showed peak responses followed by either sustained or transient adaptation, respectively. PKC showed a peak response followed by adaptation, whereas CaMKII, which is activated solely by  $\text{Ca}^{2+}$ , showed a relatively delayed increase without adaptation. The CaMKII responses showed initial kinetics and a dose-response relation similar to that of  $\text{Ca}^{2+}$ , while other species showed a markedly reduced kinetics and cooperativity (Fig. 3). These results are in agreement with experimental results from Zhu et al. (59). Simulations with a higher  $\text{Ca}^{2+}$  baseline indicated that  $\text{Ca}^{2+}$  decreased significantly after AngII stimulation, but returned to the initial steady-state levels after withdrawal of AngII (Fig. 2 F). For high baseline condition, PLC $\beta$ , IP $_3$ , and PKC showed increases in their levels after AngII stimulation but showed saturated response at high AngII doses (Fig. 2 G). The CaMKII response, however, dis-

played a decrease in levels because it was activated solely by intracellular  $\text{Ca}^{2+}$ .

We examined the dose-dependency of the AngII-mediated peak  $\text{Ca}^{2+}$  response for the high and low  $\text{Ca}^{2+}$  baseline conditions. Hill equation fits for the high  $\text{Ca}^{2+}$  baseline condition yielded a lower  $K_{0.5}$  value compared to that of the low  $\text{Ca}^{2+}$  baseline (Fig. 3 A). This suggests that there is differential sensitivity to AngII for the high versus low  $\text{Ca}^{2+}$  baseline. We fitted Hill equations to both peak and steady state ( $t = 300$  s) AngII dose-response relations for PLC $\beta$ , IP $_3$ , PKC, and CaMKII (Fig. 3 B and see Table S5). The results showed similar dose response profiles for PLC $\beta$ , IP $_3$ , and PKC in the high and low  $\text{Ca}^{2+}$  baseline conditions. This similarity trend was obtained for both the peak and steady-state responses of PLC $\beta$ , IP $_3$ , and PKC (see Table S5). In contrast, the deactivation of CaMKII after AngII application to the high  $\text{Ca}^{2+}$  baseline condition had a lower  $K_{0.5}$  value compared to the low baseline condition.

This suggests that the deactivation of CaMKII in the high  $\text{Ca}^{2+}$  baseline condition is more sensitive to AngII concentration when compared to the activation of CaMKII in the low  $\text{Ca}^{2+}$  baseline condition. Although active PKC levels were elevated in the high  $\text{Ca}^{2+}$  baseline condition, the responsiveness of PKC to AngII stimulation was similar in both  $\text{Ca}^{2+}$  baseline conditions. However, while the changes in CaMKII levels were relatively small in the high  $\text{Ca}^{2+}$  baseline condition, the AngII dose-dependence of CaMKII deactivation relation was left-shifted compared to the low  $\text{Ca}^{2+}$  baseline condition. Further, we found that the baseline firing rate was elevated in the high  $\text{Ca}^{2+}$  baseline state (see Fig. S2). This increase in baseline firing rate was due to increase in baseline CaMKII levels, and application of AngII induced a slow and small change in excitability, resulting in an electrophysiological state comparable to that of the low  $\text{Ca}^{2+}$  baseline state (see details in Section S3 in the Supporting Material).

### Distinct dynamic contributions of CaMKII and PKC to AngII-mediated changes in neuronal excitability

To examine the relative contributions of PKC- and CaMKII-mediated phosphorylation of  $K_{\text{DR}}$  channels to AngII-mediated firing rate responses, we simulated in silico blockade of each phosphorylation mechanism by removing the corresponding reactions from the model individually and in combination (Fig. 4 A). Such scenarios are biologically plausible if the phosphorylation sites are unavailable due to genetic polymorphisms (60). The wild-type simulation (Fig. 4 B, condition 1) showed an excitability increase after AngII stimulation that exhibited adaptation in the continuous presence of AngII. Occluding PKC-dependent channel modulation (Fig. 4 B, condition 2) significantly altered the response to result in a faster, but delayed, increase in firing rate without adaptation. Blocking CaMKII-dependent

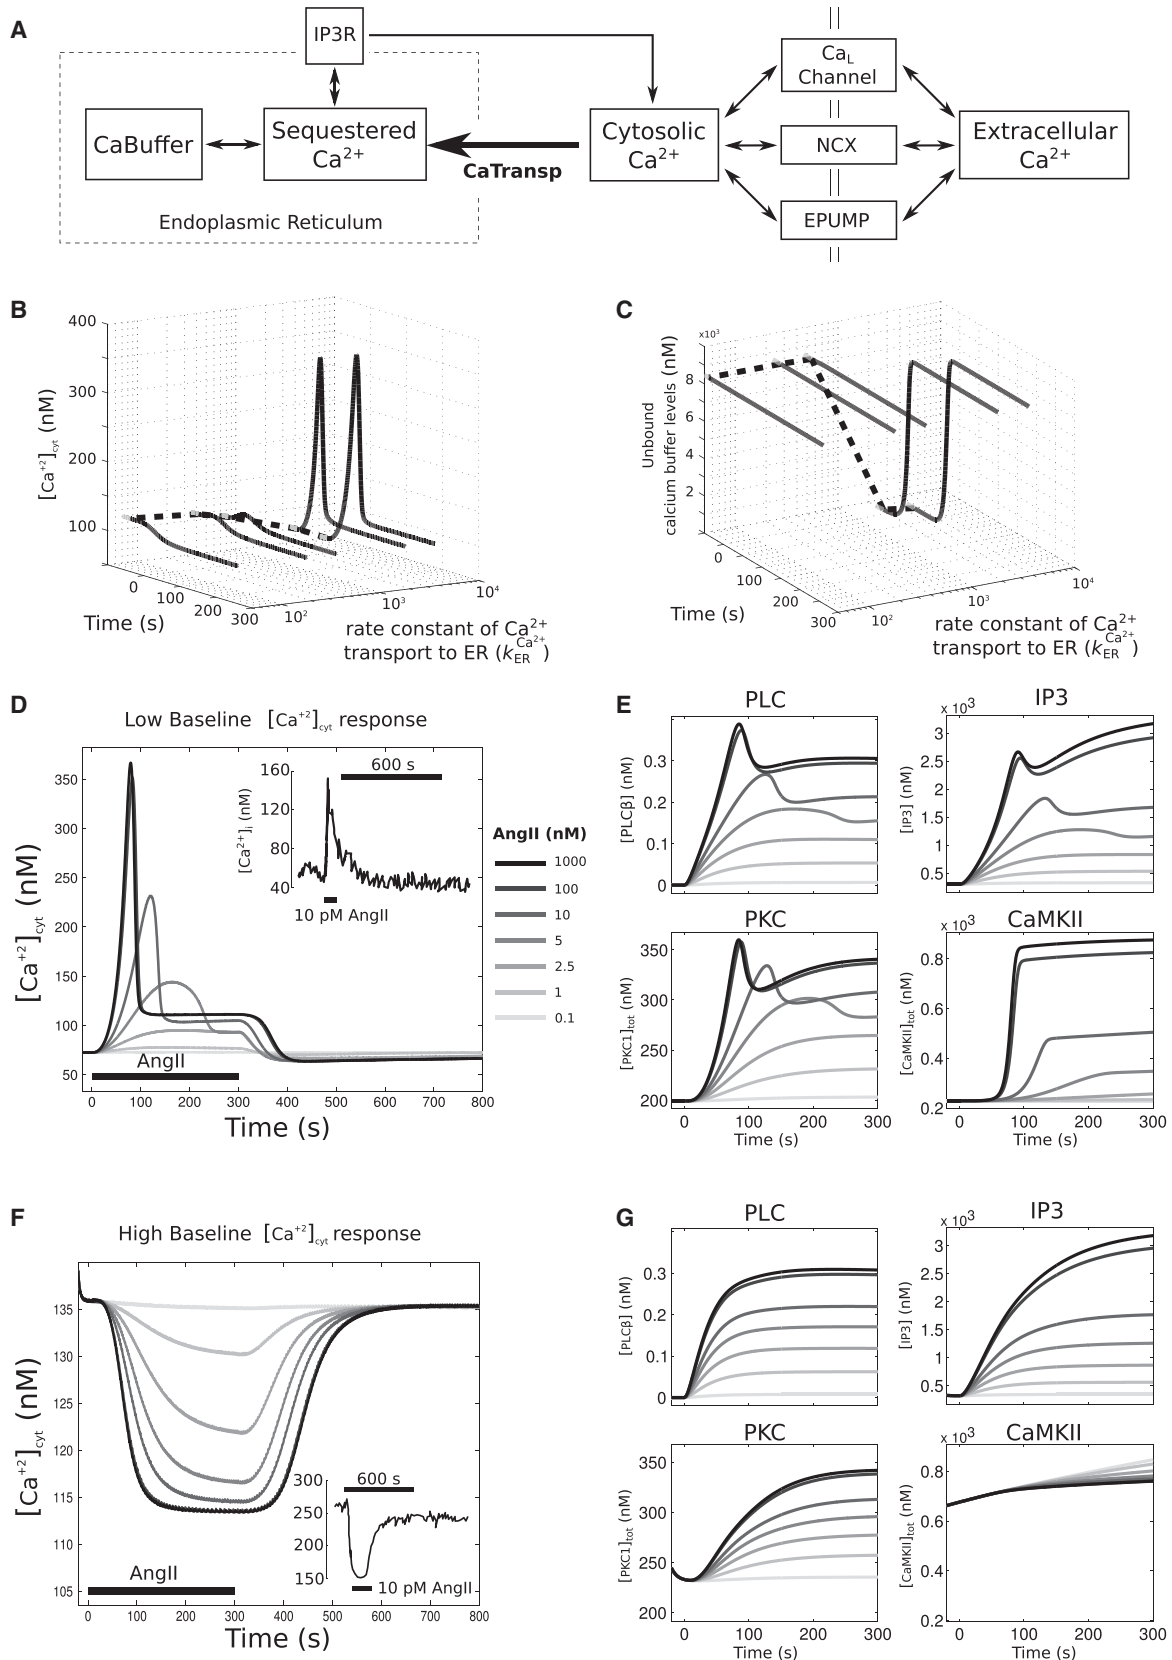

FIGURE 2 Nonlinear baseline  $Ca^{2+}$ -dependent response to AngII stimulus, in which low cytosolic  $Ca^{2+}$  baseline levels resulted in an increase in cytosolic  $Ca^{2+}$  and high cytosolic  $Ca^{2+}$  levels resulted in a decrease in cytosolic  $Ca^{2+}$  levels. (A) Schematic of  $Ca^{2+}$  regulatory dynamics. (B) Dynamic traces of

(legend continued on next page)

phosphorylation (Fig. 4 B, condition 3) had an effect on overall gain but not on the pattern of neuronal adaptation. Blocking modulation by both kinases (Fig. 4 B, condition 4) abrogated the AngII-mediated increase in neuronal excitability. These results indicate that NCX alone does not influence the neuronal firing rate under the conditions of our simulations, whereas CaMKII and PKC have distinctive effects on the dynamics of neuronal firing rate responses to AngII stimulation. Both conditions of kinase phosphorylation occlusion resulted in similar steady-state firing rates that were ~75% of the wild-type response, indicating a nonlinear interaction among kinases.

We next investigated the dose-response effects of AngII on excitability (Fig. 4, D–F). We applied a range of AngII doses and fitted Hill equations to the rate versus dose relations at peak and at steady state (see Table S6). The results for steady-state fits showed that the wild-type phenotype (condition 1) had a reduced sensitivity to AngII when compared to the individual *in silico* blockade conditions (1,2), both of which showed similar sensitivities to AngII (Fig. 4 F). These results suggest that pronounced reductions in the activity of either kinase individually will reduce the excitability response amplitude but increase the sensitivity to AngII. Results for fits to peak firing rates showed similar trends (see Table S6 and Fig. S4). Although firing rates were different at the times of peak responses in conditions 1–3, AP waveforms were similar, indicating the absence of  $K_{DR}$  phosphorylation effects on AP threshold or repolarization (Fig. 4 G). To interrogate the electrophysiological basis for observed effects, we examined the ionic contributions to the AngII firing rate responses in conditions 1–3 at times of peak AngII responses in each respective condition. The results showed that occluding phosphorylation of  $K_{DR}$  led to subtle changes in  $Na^+$ ,  $K_{AHP}$ , and  $K_{DR}$  currents during interspike intervals (Fig. 4 H). This suggests that differences in  $K_{DR}$  phosphorylation, as determined by the relative contributions of PKC and CaMKII, alter the contributions of other ionic conductances and thereby modify the overall electrophysiological response to AngII stimulus.

### Kinetic channel modulation is required to account for the dynamics of AngII-mediated excitability changes

We hypothesized that the kinetics of AngII signaling pathway activation are required to shape the dynamic

response profile. To test this hypothesis, we evaluated the electrophysiological response under three distinct  $K_{DR}$  phosphorylation conditions:

1. Higher steady-state phosphorylation,
2. Step change to instantaneously increased phosphorylation, and
3. Signaling kinase-mediated dynamic changes in phosphorylation (Fig. 5 A).

The results showed that a steady-state reduction of  $K_{DR}$  conductance produced a constant firing rate (Fig. 5 B). A step reduction in  $K_{DR}$  conductance produced a transient excitability increase followed by a constant firing rate. The dynamic profile of the firing rate change due to kinetic signaling activity was strikingly different from those elicited by steady state and as step changes in  $K_{DR}$  phosphorylation (Fig. 5 B). Hence, we conclude that the signaling kinase-mediated phosphorylation of  $K_{DR}$  is required to reproduce the dynamics of the experimentally observed neuronal response to AngII stimulation (Fig. 1 E).

## DISCUSSION

Neuromodulation is a subject under intense investigation in experimental and computational neuroscience, given its role in a plethora of physiological, behavioral, and cognitive functions of the central/peripheral nervous systems in health and disease (1–3,61–63). This work integrates a large-scale biochemical signaling network with a detailed Hodgkin-Huxley-like model of membrane electrophysiology to study dynamic neuromodulation. While biochemically detailed models have been developed that incorporate neuromodulator-induced signaling influences on specific ion channels, these models do not contain a cadre of ion channels sufficient for suprathreshold membrane potential dynamics and AP firing (64–66). Models have been developed that integrate temporal and spatial scales of calcium dynamics and multiple channels in dendrites to investigate mechanisms underlying synaptic plasticity (42–44,67–69). Some models of cardiac physiology incorporated GPCR-mediated modulation of signaling cascades (9,10), while others either do not include GPCRs or else simulate their effects as steady-state parameter changes (70–72). In addition, the majority of the published neuromodulation models have simulated the modulatory influences on electrophysiology with steady-state parameter variations, whereas only some

---

cytosolic  $Ca^{2+}$  as a function of change in the rate constant of a  $Ca^{2+}$  transport into the ER ( $k_{ER}^{Ca^{2+}}$ ). (Solid lines) Time period where 100 nM AngII was applied; (shaded lines) steady-state levels preceding AngII application. Decreasing the  $k_{ER}^{Ca^{2+}}$  from 3600 to 36  $\mu m^{-2} s^{-1}$  increases the  $Ca^{2+}$  baseline levels from ~72 to 136 nM (dotted line). (C) Dynamic traces of unbound calcium buffer levels as a function of change in  $k_{ER}^{Ca^{2+}}$ . For plot details, see (B). Decrease in  $k_{ER}^{Ca^{2+}}$  drains out all stored  $Ca^{2+}$  in the buffer before AngII application (total capacity of the saturated buffer = 9091 nM). (D) AngII dose-dependence of cytosolic  $Ca^{2+}$  response for low cytosolic  $Ca^{2+}$  baseline condition. (Inset, top right) Intracellular calcium tracing from primary cultures of neonatal rat sympathetic neurons when exposed to 3 min AngII pulses (10 pM) for low baseline condition (27). (E) Upstream responses of PLC $\beta$  and IP $_3$ , and downstream kinase responses of PKC and CaMKII for the low  $Ca^{2+}$  baseline condition. (F) AngII dose-dependence of cytosolic  $Ca^{2+}$  response for high cytosolic  $Ca^{2+}$  baseline condition. (Inset, bottom-right panel) Intracellular calcium tracings taken from cells (see D for details) with a higher baseline (>200 nM). (G) High  $Ca^{2+}$  baseline condition upstream responses of PLC $\beta$  and IP $_3$ , and downstream kinase responses of PKC and CaMKII.

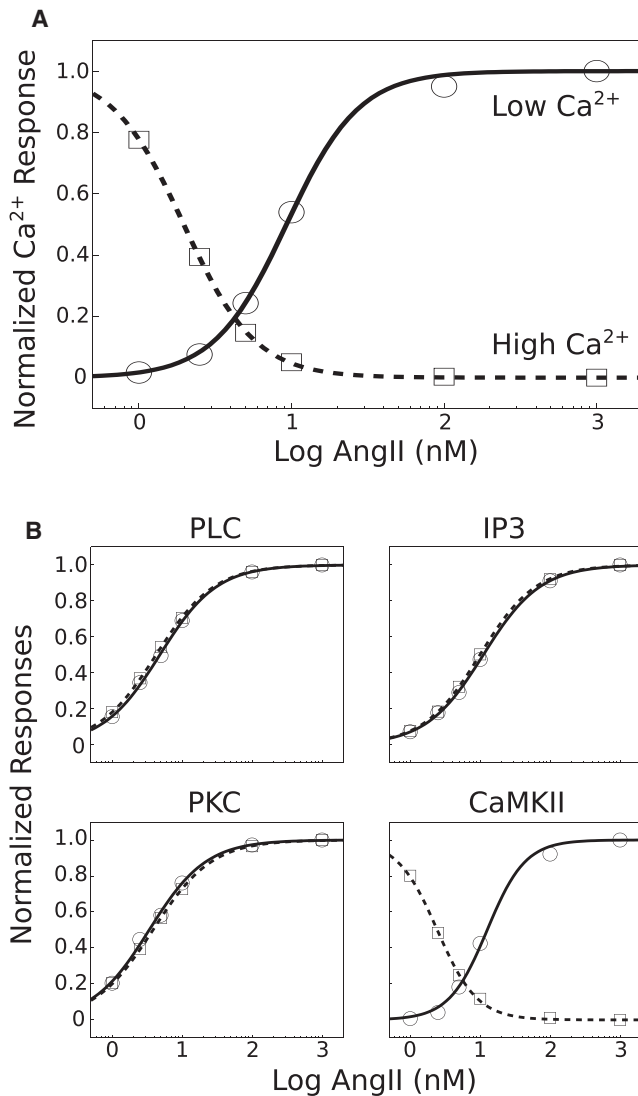

**FIGURE 3** AngII dose-dependence of divergent Ca<sup>2+</sup> responses. (A) Baseline-subtracted peak deflections were normalized and plotted for high and low Ca<sup>2+</sup> baseline phenotypes. Dose-response data were fitted with the Hill equation:  $[\text{AngII}]^{n_H} / ([\text{AngII}]^{n_H} + K_{0.5}^{n_H})$ . Fit results indicate that the high Ca<sup>2+</sup> baseline phenotype is more sensitive to AngII as compared to that of the low Ca<sup>2+</sup> baseline phenotype ( $K_{0.5} = 2.0$  nM and  $K_{0.5} = 9.3$  nM, respectively). However, the cooperativity coefficients were nearly identical ( $n_H = 1.85, 1.82$ ). (B) Steady-state responses ( $t = 300$  s) of PLC, IP<sub>3</sub>, PKC, and CaMKII were baseline-subtracted, normalized, and fitted as described above. Dose-response relations for PLC, IP<sub>3</sub>, and PKC were nearly identical for the high- and low-Ca<sup>2+</sup> baseline phenotypes (see Table S4 for all fit parameters). Because CaMKII is activated by cytosolic Ca<sup>2+</sup>, active CaMKII levels decrease along with Ca<sup>2+</sup> in the high baseline condition. The AngII-dependence of the CaMKII response is pronounced in the high baseline phenotype relative to the low Ca<sup>2+</sup> baseline condition ( $K_{0.5} = 2.4$  nM and  $K_{0.5} = 12.6$  nM, respectively), while the cooperativity coefficients were similar ( $n_H = 1.52, 1.59$ ). Dose response relations for peak responses yielded similar trends (see Table S4).

models have included kinetics based on coarse-grained abstractions of the underlying cell signaling pathways (8). A quantitative study of neuromodulation, therefore, must inte-

grate GPCR-neuropeptide interactions, biochemical signaling pathways, calcium dynamics, and membrane electrophysiology to thoroughly interrogate the underlying dynamical interactions (40,41). Because signaling events evolve over seconds and electrophysiological dynamics span milliseconds, integrative modeling of neuromodulation necessitates the bridging of timescales. It also entails signaling events that span multiple spatial components, from organelle to cell. Thus, we developed a multiscale modeling approach to study neuromodulation in the context of AngII-mediated influences on brainstem neurons.

Our model captured two distinct experimentally observed divergent AngII-mediated response patterns. AngII elicits a cytosolic Ca<sup>2+</sup> increase at low baseline Ca<sup>2+</sup> levels and a Ca<sup>2+</sup> decrease at high baseline Ca<sup>2+</sup> levels (27). Effects of intracellular Ca<sup>2+</sup> diffusion, particularly during transport to and from ER, have been noted in oscillatory Ca<sup>2+</sup> releases (73). However, Ca<sup>2+</sup> diffusion within the cell cytoplasm is much slower compared to the intracellular release due to second messenger activation such as IP<sub>3</sub> (74). Because our model contains nonoscillatory Ca<sup>2+</sup> mobilization, we considered that the flux due to Ca<sup>2+</sup> diffusion has minimal effect in comparison to the fluxes of channels/pumps, and ignored the former component in this model. Further analysis of the simulation results revealed that the decrease in cytosolic Ca<sup>2+</sup> can be explained by reducing the rate constant of Ca<sup>2+</sup> flux into the ER. These results suggest that the signaling system is recalibrated in conditions of high Ca<sup>2+</sup> such that the ER Ca<sup>2+</sup> stores are completely eliminated. This finding indicated that the augmentation of Ca<sup>2+</sup> baseline levels elevated baseline neuronal firing frequency but diminished the changes in AngII-induced excitability. These observations are consistent with data showing that repeated applications of AngII lead to tachyphylaxis (75,76). The Ca<sup>2+</sup> baseline-dependence of AngII-mediated responses is also consistent with the observation that AngII elicits divergent effects on blood pressure in vivo via actions within the rostral brainstem (77). Such alterations of Ca<sup>2+</sup> responses may have important implications for AngII-mediated effects on gene expression and gene regulatory influences on autonomic control of cardiovascular physiology (78,79).

Pharmacological studies have implicated a definitive role of PKC and CaMKII in the modulation of various ion channels. In particular, the delayed rectifier potassium (K<sub>DR</sub>) current decreases upon AT1R activation by AngII in brainstem neurons (35–39). The inhibition of K<sub>DR</sub> current is believed to occur after direct phosphorylation of Kv2.2 subunits (35,36). Although it is still unclear whether direct phosphorylation of Kv2.2 occurs, Kv2.1 channels have been shown to be directly phosphorylated (80). Inhibition of K<sub>A</sub> has also been shown to occur after direct phosphorylation of the Kv1.4a subunit at putative PKC and CaMKII sites (81). However, we found that inhibition of K<sub>A</sub> current did not alter firing rate significantly relative to changes in K<sub>DR</sub>



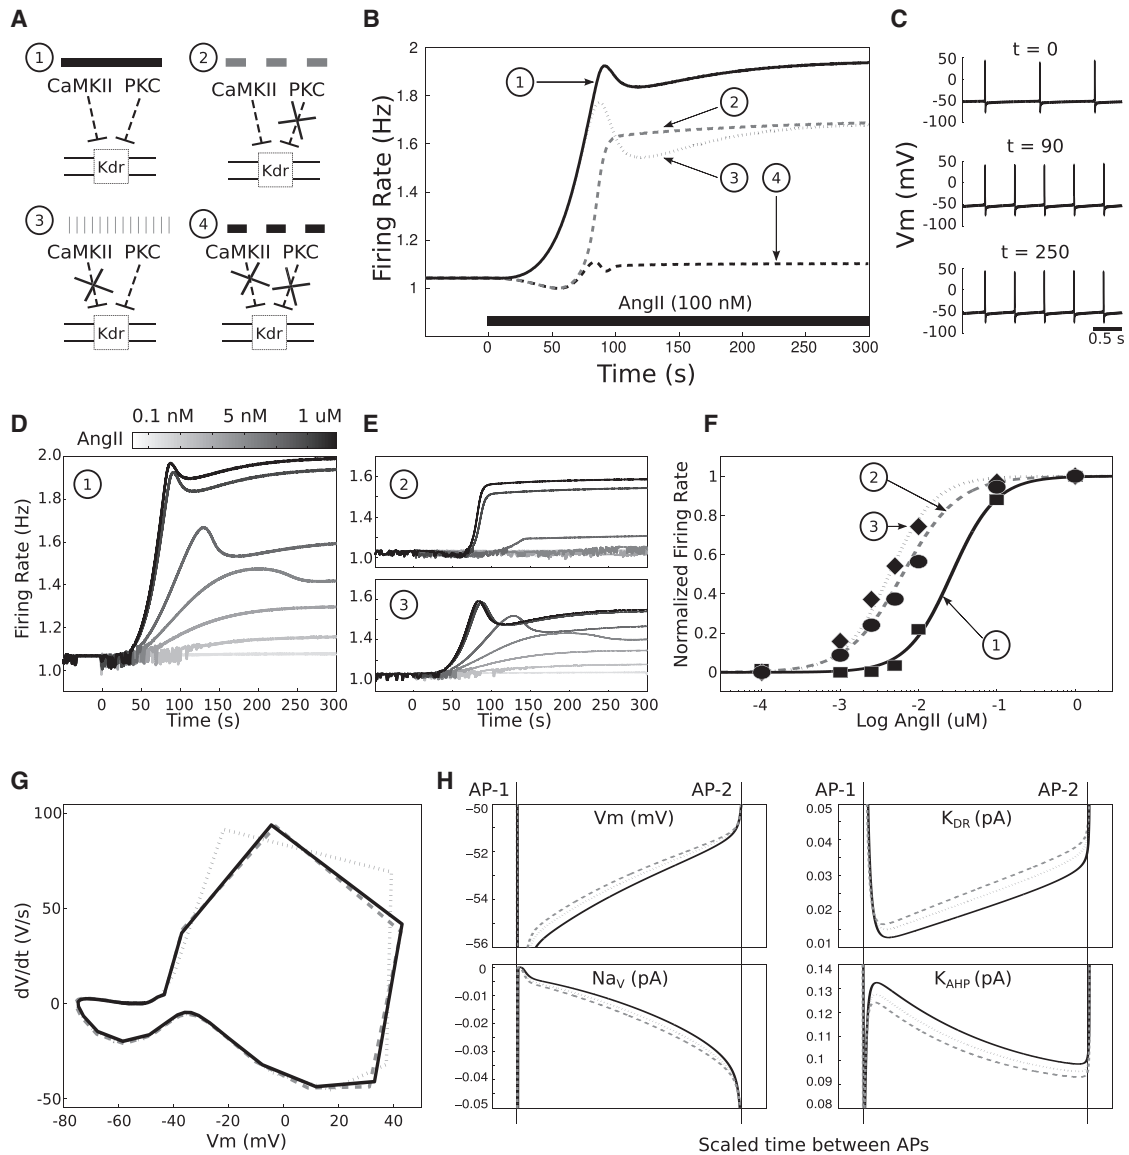

**FIGURE 4** Distinct dynamic contributions of PKC and CaMKII to AngII-mediated excitability changes. (A) The neuronal response to AngII was simulated in four conditions: 1), the wild-type reference simulation; 2), occluding PKC phosphorylation of  $K_{DR}$ ; 3), occluding CaMKII phosphorylation of  $K_{DR}$ ; and 4), occluding both CaMKII and PKC-mediated phosphorylation of  $K_{DR}$ . (B) Firing rate responses to 100 nM AngII (starting at  $t = 0$  s) are shown for all four conditions. (C) Membrane potential time-series at  $t = 0, 90, 250$  s showing increases in excitability after AngII application to the wild-type model (1). (D and E) Responses at a range of AngII input levels are shown for the wild-type and single kinase phosphorylation occlusion conditions (conditions 1–3). (F) Baseline-subtracted firing rate responses at steady state ( $t = 300$  s) are plotted as a function of AngII concentration for conditions 1–3. Each relation was fitted with a Hill equation:  $[\text{AngII}]^{n_H} / ([\text{AngII}]^{n_H} + K_{0.5}^{n_H})$ . (G) Phase-space representations of APs at the times of peak responses to AngII for conditions 1–3 (same legend as in B and F). (H) Interspike interval biophysical properties of conditions 1–3 at times of peak responses to AngII. Abbreviations:  $V_m$  = membrane potential,  $Na_V$  =  $Na^+$  current,  $K_{DR}$  =  $K_{DR}$  current, and  $K_{AHP}$  =  $K_{AHP}$  current.

conductance in our model. Hence, we did not simulate kinase-mediated phosphorylation reactions with  $K_A$  channels. Our assessments of the relative contributions of PKC and CaMKII to AngII-mediated modulation of firing rate showed that these kinases reduced the neuronal sensitivity to AngII. The steady-state excitability response to saturating AngII doses is largely intact in the complete absence of either of the kinases, suggesting a high degree of redundancy in the dual kinase system within our model. The ki-

netic contributions of each kinase is also distinct such that PKC determines the initial response kinetics and firing rate adaptation, whereas CaMKII contributes exclusively to firing rate gain while reducing the extent of adaptation. Overall, our simulations suggest that PKC and CaMKII fine-tunes the degree, timing, and adaptation of excitability responses to AngII. Our simulation results could be experimentally tested via targeted perturbations of these kinases in brainstem cardiac control regions, which could ameliorate

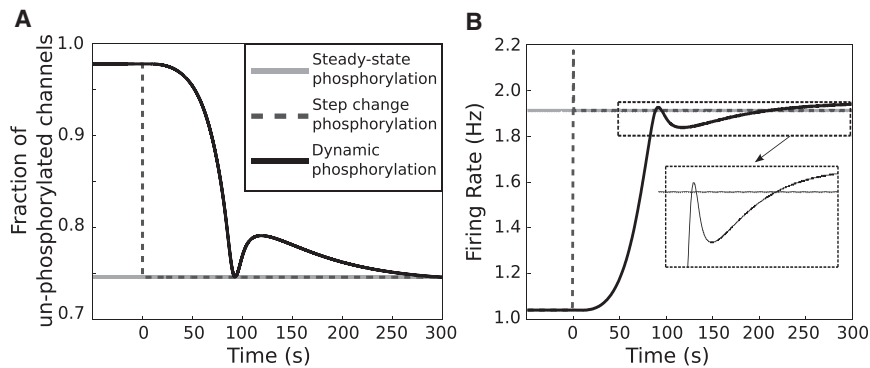

**FIGURE 5** Dynamic  $K_{DR}$  channel modulation emerging from signaling activities is necessary to account for the dynamics of AngII-induced neuronal excitability. (A) Simulated fractions of un-phosphorylated  $K_{DR}$  channels for three scenarios describing AngII-mediated  $K_{DR}$  channel phosphorylation: (1), a steady-state increase (2), a step-change increase, and (3), dynamic modulation. (B) AngII-induced firing rate responses (100 nM starting at  $t = 0$  s) for the three simulated scenarios. (Inset) Distinct effects of dynamic phosphorylation corresponding to Scenario 3 as compared to those of nondynamic phosphorylation (Scenarios 1 and 2).

the aberrant effects of AngII on sympathetic overdrive observed in conditions such as hypertension and heart failure (21).

Molecular neuronal pathways elicited by AngII binding to AT1R in brainstem neurons are involved in the regulation of blood pressure and development of hypertension (14,82–84). These activated pathways include those that trigger short-term increase in neuronal firing rate as well as those that affect gene expressions and protein levels for longer-term effects leading to sustained changes in neuronal activities (6,33,85,86). Our model-based results connect the alteration in Gq-mediated signaling to the short-term implications on electrophysiological behavior by linking it through activation of PKC and CaMKII, in consistency with experimental findings (6,33). Our results predict that each of the two signaling kinases provide distinct regulatory influence on neuronal excitability, suggesting a differential pathway-specific sensitivity of the neuronal circuit controlling blood pressure. Experimentally observed aberrations in the kinase activities in pathophysiological conditions can be interpreted through our model-based approach to understand the effects of AngII on the balance between excitatory and inhibitory effects on sympathetic neurons (34,46,47). Opportunities exist for an unbiased approach to identify key sensitivities in the integrated multiscale network, for example, utilizing global sensitivity analysis and decision trees (78). AngII effects on overall cardiovascular physiology are difficult to predict due to the involvement of AngII signaling in multiple cell types in the control circuit, leading to the push-pull hypothesis of AngII action (77). Our integrated model can be extended across multiple cell types to explore the network balances in computationally testing the push-pull hypothesis toward explaining the nonlinear effects of AngII on sympathoexcitation as well as sympathoinhibition (20,21,87).

A key characteristic of our model is the inclusion of a highly detailed signaling cascade, validated with experimental data from neurons (19). Building on models that consider instantaneous parameter perturbations to simulate the effects of neuromodulators on downstream targets, we examined the effects of signaling kinetics on firing rate dynamics. Simulations support the hypothesis that dynamic

neuromodulation is critical for AngII-mediated excitability dynamics, which cannot be captured by simulating neuromodulation as steady-state or step reductions of the  $K_{DR}$  conductance. Overall, our modeling work suggests that the dynamic interplay among neuromodulatory influences, ionic conductances, and membrane potential determine neuromodulator response in a nonlinear fashion.

Our modeling approach can be expanded to address several physiological questions. Simulations of subthreshold membrane dynamics and synaptic integration can be performed to study the neuromodulation of excitatory and inhibitory input processing. Neuromodulator effects on neural circuits can be studied using our model as a basis for simulating individual cells. The combination of signaling pathway activity with electrophysiology can be integrated into morphologically detailed neuronal models that incorporate experimentally determined spatial variations in channel distributions (88,89). Our model can also be integrated with AngII-signaling-induced transcriptional regulatory networks to bridge neuromodulation of signaling and electrophysiology with gene expression (78). In the context of autonomic regulation of cardiovascular control, our model could be expanded to study the mechanisms and consequences of aberrant AngII signaling in brainstem neurons from hypertensive rats, based on extensive data on signaling activity and electrophysiological responses to AngII in spontaneously hypertensive rats (47,90–92). Hence, our multiscale model of integrated signaling and electrophysiology offers broader utility as a platform for studies of neuromodulatory mechanisms underlying physiological function.

## SUPPORTING MATERIAL

Supporting Materials and Methods, four figures, six tables, and seven equations are available at [http://www.biophysj.org/biophysj/supplemental/S0006-3495\(14\)03061-6](http://www.biophysj.org/biophysj/supplemental/S0006-3495(14)03061-6).

## ACKNOWLEDGMENTS

This study was supported by National Institute of General Medical Sciences grant No. R01 GM083108 and National Heart, Lung, and Blood Institute grant No. R01 HL111621.

## SUPPORTING CITATIONS

Reference (93) appears in the Supporting Material.

## REFERENCES

- Marder, E. 2012. Neuromodulation of neuronal circuits: back to the future. *Neuron*. 76:1–11.
- Levitan, I. B. 1994. Modulation of ion channels by protein phosphorylation and dephosphorylation. *Annu. Rev. Physiol.* 56:193–212.
- Finkel, L. H. 2000. Neuroengineering models of brain disease. *Annu. Rev. Biomed. Eng.* 2:577–606.
- Lu, D., H. Yang, and M. K. Raizada. 1996. Angiotensin II regulation of neuromodulation: downstream signaling mechanism from activation of mitogen-activated protein kinase. *J. Cell Biol.* 135:1609–1617.
- Lu, D., H. Yang, ..., M. K. Raizada. 1998. Regulation of angiotensin II-induced neuromodulation by MARCKS in brain neurons. *J. Cell Biol.* 142:217–227.
- Summers, C., M. A. Fleegal, and M. Zhu. 2002. Angiotensin AT1 receptor signaling pathways in neurons. *Clin. Exp. Pharmacol. Physiol.* 29:483–490.
- Temporal, S., M. Desai, ..., J. Golowasch. 2012. Neuromodulation independently determines correlated channel expression and conductance levels in motor neurons of the stomatogastric ganglion. *J. Neurophysiol.* 107:718–727.
- Fellous, J. M., and C. Linster. 1998. Computational models of neuromodulation. *Neural Comput.* 10:771–805.
- Saucerman, J. J., L. L. Brunton, ..., A. D. McCulloch. 2003. Modeling  $\beta$ -adrenergic control of cardiac myocyte contractility in silico. *J. Biol. Chem.* 278:47997–48003.
- Tao, T., D. J. Paterson, and N. P. Smith. 2011. A model of cellular cardiac-neural coupling that captures the sympathetic control of sinoatrial node excitability in normotensive and hypertensive rats. *Biophys. J.* 101:594–602.
- Dolan, A. T., and S. L. Diamond. 2014. Systems modeling of  $\text{Ca}^{2+}$  homeostasis and mobilization in platelets mediated by  $\text{IP}_3$  and store-operated  $\text{Ca}^{2+}$  entry. *Biophys. J.* 106:2049–2060.
- Fridlyand, L. E., and L. H. Philipson. 2011. Coupling of metabolic, second messenger pathways and insulin granule dynamics in pancreatic  $\beta$ -cells: a computational analysis. *Prog. Biophys. Mol. Biol.* 107:293–303.
- Salvucci, M., Z. Neufeld, and P. Newsholme. 2013. Mathematical model of metabolism and electrophysiology of amino acid and glucose stimulated insulin secretion: in vitro validation using a  $\beta$ -cell line. *PLoS ONE*. 8:e52611.
- Touyz, R. M., Q. Pu, ..., E. Viel. 2002. Effects of low dietary magnesium intake on development of hypertension in stroke-prone spontaneously hypertensive rats: role of reactive oxygen species. *J. Hypertens.* 20:2221–2232.
- McCubbin, J. W., R. S. DeMoura, ..., F. Olmsted. 1965. Arterial hypertension elicited by subpressor amounts of angiotensin. *Science*. 149:1394–1395.
- Hogarty, D. C., E. A. Speakman, ..., M. I. Phillips. 1992. The role of angiotensin, AT1 and AT2 receptors in the pressor, drinking and vaso-pressor responses to central angiotensin. *Brain Res.* 586:289–294.
- Phillips, M. I., and C. Summers. 1998. Angiotensin II in central nervous system physiology. *Regul. Pept.* 78:1–11.
- Ferguson, A. V., D. L. Washburn, and K. J. Latchford. 2001. Hormonal and neurotransmitter roles for angiotensin in the regulation of central autonomic function. *Exp. Biol. Med. (Maywood)*. 226:85–96.
- Mishra, J., and U. S. Bhalla. 2002. Simulations of inositol phosphate metabolism and its interaction with  $\text{InsP}_3$ -mediated calcium release. *Biophys. J.* 83:1298–1316.
- Accorsi-Mendonca, D., and B. Machado. 2013. Synaptic transmission of baro- and chemoreceptors afferents in the NTS second order neurons. *Autonom. Neurosci.* 175:3–8.
- Guyenet, P. G. 2006. The sympathetic control of blood pressure. *Nat. Rev. Neurosci.* 7:335–346.
- Thrasher, T. N. 2006. Arterial baroreceptor input contributes to long-term control of blood pressure. *Curr. Hypertens. Rep.* 8:249–254.
- Shan, Z., J. Zubcevic, ..., M. K. Raizada. 2013. Chronic knockdown of the nucleus of the solitary tract AT1 receptors increases blood inflammatory-endothelial progenitor cell ratio and exacerbates hypertension in the spontaneously hypertensive rat. *Hypertension*. 61:1328–1333.
- Zubcevic, J., J. Y. Jun, ..., Z. Shan. 2013. Nucleus of the solitary tract (pro)renin receptor-mediated antihypertensive effect involves nuclear factor- $\kappa$ B-cytokine signaling in the spontaneously hypertensive rat. *Hypertension*. 61:622–627.
- Cuadra, A. E., Z. Shan, ..., M. K. Raizada. 2010. A current view of brain renin-angiotensin system: is the (pro)renin receptor the missing link? *Pharmacol. Ther.* 125:27–38.
- Paton, J. F., S. Wang, ..., S. Kasparov. 2008. Signaling across the blood brain barrier by angiotensin II: novel implications for neurogenic hypertension. *J. Mol. Med.* 86:705–710.
- Fernandez, S. F., M. H. Huang, ..., J. L. Izzo, Jr. 2003. Modulation of angiotensin II responses in sympathetic neurons by cytosolic calcium. *Hypertension*. 41:56–63.
- Fernandez, S. F., M. H. Huang, ..., J. L. Izzo, Jr. 2005. Mechanisms of angiotensin II-mediated decreases in intraneuronal  $\text{Ca}^{2+}$  in calcium-loaded stellate ganglion neurons. *Hypertension*. 45:276–282.
- Monck, J. R., R. E. Williamson, ..., J. R. Williamson. 1990. Angiotensin II effects on the cytosolic free  $\text{Ca}^{2+}$  concentration in N1E-115 neuroblastoma cells: kinetic properties of the  $\text{Ca}^{2+}$  transient measured in single fura-2-loaded cells. *J. Neurochem.* 54:278–287.
- Li, Y. W., and P. G. Guyenet. 1996. Angiotensin II decreases a resting  $\text{K}^+$  conductance in rat bulbospinal neurons of the C1 area. *Circ. Res.* 78:274–282.
- Zhu, M., R. R. Neubig, ..., C. Summers. 1997. Modulation of  $\text{K}^+$  and  $\text{Ca}^{2+}$  currents in cultured neurons by an angiotensin II type 1a receptor peptide. *Am. J. Physiol.* 273:C1040–C1048.
- Richards, E. M., M. K. Raizada, ..., C. Summers. 1999. Angiotensin II type 1 receptor-modulated signaling pathways in neurons. *Mol. Neurobiol.* 19:25–41.
- Sun, C., C. Summers, and M. K. Raizada. 2002. Chronotropic action of angiotensin II in neurons via protein kinase C and CaMKII. *Hypertension*. 39:562–566.
- Wong, L. F., J. W. Polson, ..., S. Kasparov. 2002. Genetic and pharmacological dissection of pathways involved in the angiotensin II-mediated depression of baroreflex function. *FASEB J.* 16:1595–1601.
- Gelband, C. H., J. D. Warth, ..., C. Summers. 1999. Angiotensin II type 1 receptor-mediated inhibition of  $\text{K}^+$  channel subunit kv2.2 in brain stem and hypothalamic neurons. *Circ. Res.* 84:352–359.
- Pan, S., C. Summers, and C. Gelband. 2000. Kv1.4 underlies angiotensin II-mediated inhibition of neuronal A-type  $\text{K}^+$  current. *Biophys. J.* 78:450A.
- Pan, S. J., M. Zhu, ..., C. H. Gelband. 2001. ANG II-mediated inhibition of neuronal delayed rectifier  $\text{K}^+$  current: role of protein kinase C- $\alpha$ . *Am. J. Physiol. Cell Physiol.* 281:C17–C23.
- Wang, D., C. H. Gelband, ..., P. Posner. 1997. Mechanisms underlying the chronotropic effect of angiotensin II on cultured neurons from rat hypothalamus and brain stem. *J. Neurophysiol.* 78:1013–1020.
- Wang, D., C. Summers, ..., C. H. Gelband. 1997. A-type  $\text{K}^+$  current in neurons cultured from neonatal rat hypothalamus and brain stem: modulation by angiotensin II. *J. Neurophysiol.* 78:1021–1029.
- Blackwell, K. T., and J. Jedrzejewska-Szmek. 2013. Molecular mechanisms underlying neuronal synaptic plasticity: systems biology meets computational neuroscience in the wilds of synaptic plasticity. *Wiley Interdiscip. Rev. Syst. Biol. Med.* 5:717–731.

41. Bhalla, U. S. 2003. Understanding complex signaling networks through models and metaphors. *Prog. Biophys. Mol. Biol.* 81:45–65.
42. Ferrante, M., K. T. Blackwell, ..., G. A. Ascoli. 2008. Computational models of neuronal biophysics and the characterization of potential neuropharmacological targets. *Curr. Med. Chem.* 15:2456–2471.
43. Ajay, S. M., and U. S. Bhalla. 2004. A role for ERKII in synaptic pattern selectivity on the time-scale of minutes. *Eur. J. Neurosci.* 20:2671–2680.
44. Bhalla, U. S. 2004. Signaling in small subcellular volumes. II. Stochastic and diffusion effects on synaptic network properties. *Biophys. J.* 87:745–753.
45. Rybak, I. A., J. F. Paton, and J. S. Schwaber. 1997. Modeling neural mechanisms for genesis of respiratory rhythm and pattern. I. Models of respiratory neurons. *J. Neurophysiol.* 77:1994–2006.
46. Seyedabadi, M., A. K. Goodchild, and P. M. Pilowsky. 2001. Differential role of kinases in brain stem of hypertensive and normotensive rats. *Hypertension.* 38:1087–1092.
47. Sun, C., J. Du, ..., M. K. Raizada. 2003. PI<sub>3</sub>-kinase inhibitors abolish the enhanced chronotropic effects of angiotensin II in spontaneously hypertensive rat brain neurons. *J. Neurophysiol.* 90:3155–3160.
48. Hines, M. L., T. Morse, ..., G. M. Shepherd. 2004. MODELDB: a database to support computational neuroscience. *J. Comput. Neurosci.* 17:7–11.
49. Yang, H., D. Lu, ..., M. K. Raizada. 1997. Involvement of MAP kinase in angiotensin II-induced phosphorylation and intracellular targeting of neuronal AT1 receptors. *J. Neurosci.* 17:1660–1669.
50. Ouali, R., M. C. Berthelon, ..., J. M. Saez. 1997. Angiotensin II receptor subtypes AT1 and AT2 are down-regulated by angiotensin II through AT1 receptor by different mechanisms. *Endocrinology.* 138:725–733.
51. Athanasiades, A., J. W. Clark, Jr., ..., A. Bidani. 2000. An ionic current model for medullary respiratory neurons. *J. Comput. Neurosci.* 9:237–257.
52. Iwamoto, T., S. Wakabayashi, and M. Shigekawa. 1995. Growth factor-induced phosphorylation and activation of aortic smooth muscle Na<sup>+</sup>/Ca<sup>2+</sup> exchanger. *J. Biol. Chem.* 270:8996–9001.
53. Iwamoto, T., T. Watano, and M. Shigekawa. 1996. A novel isothiourea derivative selectively inhibits the reverse mode of Na<sup>+</sup>/Ca<sup>2+</sup> exchange in cells expressing NCX1. *J. Biol. Chem.* 271:22391–22397.
54. Philipson, K. D., D. A. Nicoll, ..., Z. Qiu. 2002. The Na<sup>+</sup>/Ca<sup>2+</sup> exchange molecule: an overview. *Ann. N. Y. Acad. Sci.* 976:1–10.
55. Hodgkin, A. L., and A. F. Huxley. 1952. A quantitative description of membrane current and its application to conduction and excitation in nerve. *J. Physiol.* 117:500–544.
56. Peretz, T., G. Levin, ..., I. Lotan. 1996. Modulation by protein kinase C activation of rat brain delayed-rectifier K<sup>+</sup> channel expressed in *Xenopus* oocytes. *FEBS Lett.* 381:71–76.
57. Fakler, B., and J. P. Adelman. 2008. Control of K<sub>Ca</sub> channels by calcium nano/microdomains. *Neuron.* 59:873–881.
58. Taylor, A. L., J. M. Goillard, and E. Marder. 2009. How multiple conductances determine electrophysiological properties in a multicompartiment model. *J. Neurosci.* 29:5573–5586.
59. Zhu, M., C. H. Gelband, ..., C. Sumners. 1999. Angiotensin II decreases neuronal delayed rectifier potassium current: role of calcium/calmodulin-dependent protein kinase II. *J. Neurophysiol.* 82:1560–1568.
60. Shieh, C. C., M. Coghlan, ..., M. Gopalakrishnan. 2000. Potassium channels: molecular defects, diseases, and therapeutic opportunities. *Pharmacol. Rev.* 52:557–594.
61. Hille, B. 1994. Modulation of ion-channel function by G-protein-coupled receptors. *Trends Neurosci.* 17:531–536.
62. Dayan, P. 2012. Twenty-five lessons from computational neuromodulation. *Neuron.* 76:240–256.
63. Nadim, F., and D. Bucher. 2014. Neuromodulation of neurons and synapses. *Curr. Opin. Neurobiol.* 29C:48–56.
64. Suh, B.-C., L. F. Horowitz, ..., B. Hille. 2004. Regulation of KCNQ2/KCNQ3 current by G protein cycling: the kinetics of receptor-mediated signaling by Gq. *J. Gen. Physiol.* 123:663–683.
65. Hille, B., E. Dickson, ..., B. Falkenburger. 2014. Dynamic metabolic control of an ion channel. *Prog. Mol. Biol. Transl. Sci.* 123:219–247.
66. Zhou, J., M. S. Shapiro, and B. Hille. 1997. Speed of Ca<sup>2+</sup> channel modulation by neurotransmitters in rat sympathetic neurons. *J. Neurophysiol.* 77:2040–2048.
67. Blackwell, K. T. 2013. Approaches and tools for modeling signaling pathways and calcium dynamics in neurons. *J. Neurosci. Methods.* 220:131–140.
68. Kotaleski, J. H., and K. T. Blackwell. 2010. Modeling the molecular mechanisms of synaptic plasticity using systems biology approaches. *Nat. Rev. Neurosci.* 11:239–251.
69. Bhalla, U. S. 2011. Multiscale interactions between chemical and electrical signaling in LTP induction, LTP reversal and dendritic excitability. *Neural Netw.* 24:943–949.
70. Cortassa, S., M. A. Aon, ..., R. L. Winslow. 2006. A computational model integrating electrophysiology, contraction, and mitochondrial bioenergetics in the ventricular myocyte. *Biophys. J.* 91:1564–1589.
71. Saucerman, J. J., and D. M. Bers. 2008. Calmodulin mediates differential sensitivity of CaMKII and calcineurin to local Ca<sup>2+</sup> in cardiac myocytes. *Biophys. J.* 95:4597–4612.
72. Grandi, E., S. V. Pandit, ..., D. M. Bers. 2011. Human atrial action potential and Ca<sup>2+</sup> model: sinus rhythm and chronic atrial fibrillation. *Circ. Res.* 109:1055–1066.
73. Jafri, M. S., and J. Keizer. 1995. On the roles of Ca<sup>2+</sup> diffusion, Ca<sup>2+</sup> buffers, and the endoplasmic reticulum in IP<sub>3</sub>-induced Ca<sup>2+</sup> waves. *Biophys. J.* 69:2139–2153.
74. Stutzmann, G. E., and M. P. Mattson. 2011. Endoplasmic reticulum Ca<sup>2+</sup> handling in excitable cells in health and disease. *Pharmacol. Rev.* 63:700–727.
75. Sharpe, L. G., and L. W. Swanson. 1974. Drinking induced by injections of angiotensin into forebrain and mid-brain sites of the monkey. *J. Physiol.* 239:595–622.
76. Ma, X., K. Bielefeldt, ..., M. W. Chapeau. 2006. Dual mechanisms of angiotensin-induced activation of mouse sympathetic neurones. *J. Physiol.* 573:45–63.
77. Dampney, R. A. L., P. S. P. Tan, ..., J. Horiuchi. 2007. Cardiovascular effects of angiotensin II in the rostral ventrolateral medulla: the push-pull hypothesis. *Curr. Hypertens. Rep.* 9:222–227.
78. Miller, G. M., B. A. Ogunnaike, ..., R. Vadigepalli. 2010. Robust dynamic balance of AP-1 transcription factors in a neuronal gene regulatory network. *BMC Syst. Biol.* 4:171.
79. Clark, A. J., T. Balla, ..., K. J. Catt. 1992. Stimulation of early gene expression by angiotensin II in bovine adrenal glomerulosa cells: roles of calcium and protein kinase C. *Mol. Endocrinol.* 6:1889–1898.
80. Misonou, H., D. P. Mohapatra, ..., J. S. Trimmer. 2004. Regulation of ion channel localization and phosphorylation by neuronal activity. *Nat. Neurosci.* 7:711–718.
81. Hagiwara, K., K. Nunoki, ..., T. Yanagisawa. 2003. Differential inhibition of transient outward currents of Kv1.4 and Kv4.3 by endothelin. *Biochem. Biophys. Res. Commun.* 310:634–640.
82. Allen, A. M., R. A. Dampney, and F. A. Mendelsohn. 1988. Angiotensin receptor binding and pressor effects in cat subretrofacial nucleus. *Am. J. Physiol.* 255:H1011–H1017.
83. Averill, D. B., T. Tsuchihashi, ..., C. M. Ferrario. 1994. Losartan, non-peptide angiotensin II-type 1 (AT1) receptor antagonist, attenuates pressor and sympathoexcitatory responses evoked by angiotensin II and L-glutamate in rostral ventrolateral medulla. *Brain Res.* 665:245–252.
84. Hirooka, Y., P. D. Potts, and R. A. L. Dampney. 1997. Role of angiotensin II receptor subtypes in mediating the sympathoexcitatory effects of exogenous and endogenous angiotensin peptides in the rostral ventrolateral medulla of the rabbit. *Brain Res.* 772:107–114.



85. Khan, R. L., R. Vadigepalli, ..., J. S. Schwaber. 2008. Dynamic transcriptomic response to acute hypertension in the nucleus tractus solitarius. *Am. J. Physiol. Regul. Integr. Comp. Physiol.* 295:R15–R27.
86. Park, J., A. Brureau, ..., R. Vadigepalli. 2014. Inputs drive cell phenotype variability. *Genome Res.* 24:930–941.
87. Sheriff, M. J., M. A. P. Fontes, ..., R. A. L. Dampney. 2006. Blockade of AT1 receptors in the rostral ventrolateral medulla increases sympathetic activity under hypoxic conditions. *Am. J. Physiol. Regul. Integr. Comp. Physiol.* 290:R733–R740.
88. Ascoli, G. A., K. M. Brown, ..., G. Barrionuevo. 2009. Quantitative morphometry of electrophysiologically identified CA3b interneurons reveals robust local geometry and distinct cell classes. *J. Comp. Neurol.* 515:677–695.
89. Ascoli, G. A., S. Gasparini, ..., M. Migliore. 2010. Local control of postinhibitory rebound spiking in CA1 pyramidal neuron dendrites. *J. Neurosci.* 30:6434–6442.
90. Matsuura, T., H. Kumagai, ..., T. Saruta. 2002. Rostral ventrolateral medulla neurons of neonatal Wistar-Kyoto and spontaneously hypertensive rats. *Hypertension.* 40:560–565.
91. Sun, C., J. Zubcevic, ..., M. K. Raizada. 2009. Shift to an involvement of phosphatidylinositol 3-kinase in angiotensin II actions on nucleus tractus solitarius neurons of the spontaneously hypertensive rat. *Circ. Res.* 105:1248–1255.
92. Kumagai, H., N. Oshima, ..., T. Saruta. 2012. Importance of rostral ventrolateral medulla neurons in determining efferent sympathetic nerve activity and blood pressure. *Hypertens. Res.* 35:132–141.
93. Huguenard, J. R., and D. A. Prince. 1991. Slow inactivation of a TEA-sensitive K current in acutely isolated rat thalamic relay neurons. *J. Neurophysiol.* 66:1316–1328.

# Supporting Material

## Multiscale model of dynamic neuromodulation integrating neuropeptide induced signaling pathway activity with membrane electrophysiology

Hirenkumar K. Makadia<sup>1,†</sup>, Warren D. Anderson<sup>1,2,†</sup>, Dirk Fey<sup>3,†</sup>, Thomas Sauter<sup>4</sup>,  
James S. Schwaber<sup>1,2</sup>, and Rajanikanth Vadigepalli<sup>1,2,\*</sup>

<sup>1</sup>Daniel Baugh Institute for Functional Genomics and Computational Biology, Department of Pathology,  
Anatomy and Cell Biology, Sidney Kimmel Medical College, Thomas Jefferson University, Philadelphia,  
PA, USA

<sup>2</sup>Graduate program in Neuroscience, Thomas Jefferson University, Philadelphia, PA, USA

<sup>3</sup>Systems Biology Ireland, University College Dublin, Dublin, Ireland

<sup>4</sup>University of Luxembourg, Life Sciences Research Unit, Luxembourg, Luxembourg

<sup>†</sup>These authors contributed equally to this work.

\*Correspondence: [Rajanikanth.Vadigepalli@jefferson.edu](mailto:Rajanikanth.Vadigepalli@jefferson.edu).

## S1 Material balance of cytosolic calcium

Intracellular  $\text{Ca}^{2+}$  levels in the model were modulated by calcium currents ( $I_{\text{Ca}_L}$  and  $I_{\text{NaCa}}$ ), in addition to a capacitive  $\text{Ca}^{2+}$  entry to the ER, a membrane calcium pump, and  $\text{Ca}^{2+}$  buffering processes in the ER (Figure 2A). Excess  $\text{Ca}^{2+}$  in intracellular levels is transported to ER and stored in  $\text{Ca}^{2+}$  buffer, which is released by IP3R activation. The mass balance of intracellular (cytosolic)  $\text{Ca}^{2+}$  is given by

$$\frac{d[\text{Ca}^{2+}_{\text{cyt}}]}{dt} = \underbrace{\frac{I_{\text{NaCa}} - I_{\text{Ca}_L}}{z v_{\text{cell}} F} - r_{\text{Epump}}}_{\text{Extracellular}} + \underbrace{N \cdot [\text{CaBuffer}]_{\text{T}} \left( k_{\text{ER}}^{\text{Ca}^{2+}} \cdot [\text{Ca}^{2+}_{\text{cyt}}] \cdot (1 - [\text{CaBuffer}]_{\text{B}}) - k_{-\text{ER}}^{\text{Ca}^{2+}} \cdot [\text{CaBuffer}]_{\text{B}} \right)}_{\text{Endoplasmic Reticulum}} \quad (1)$$

where  $I_{\text{NaCa}}$  is the NCX current,  $I_{\text{Ca}_L}$  is the L-type calcium channel current,  $z(=2)$  is valency of  $\text{Ca}^{2+}$  ion,  $F$  is the Faraday's constant,  $v_{\text{cell}}$  is the soma volume,  $r_{\text{Epump}}$  is the rate of  $\text{Ca}^{2+}$  transfer through extracellular pump,  $N(=40)$  is the number of binding sites on CaBuffer,  $[\text{CaBuffer}]_{\text{T}}$  is the total concentration of  $\text{Ca}^{2+}$  buffer in ER,  $[\text{CaBuffer}]_{\text{B}}$  is the concentration of bounded  $\text{Ca}^{2+}$  buffer in ER,  $k_{\text{ER}}^{\text{Ca}^{2+}}$  is the inward rate of  $\text{Ca}^{2+}$  flux to the ER, and  $k_{-\text{ER}}^{\text{Ca}^{2+}}$  is the outward rate of  $\text{Ca}^{2+}$  flux from the ER.

## S2 Electrophysiology model details

We modeled neurophysiology with an electrical circuit (Figure 1B) containing multiple ionic currents, balanced across the membrane as shown in eqs. (2) to (5)

$$C \frac{dV}{dt} = - \sum_i g_i(V) (V - E_i) \quad (2)$$

$$g_i(V) = \bar{g}_i \cdot m_i^{M_i}(V) \cdot h_i^{H_i}(V) \quad (3)$$

$$\tau_{m,i} \frac{dm_i}{dt} = m_{\infty,i} - m_i ; \quad \tau_{h,i} \frac{dh_i}{dt} = h_{\infty,i} - h_i \quad (4)$$

$$m_{\infty,i} = \left( 1 + \exp \left( - \frac{V - V_{1/2,m,i}}{k_{m,i}} \right) \right)^{-x} ; \quad h_{\infty,i} = \left( 1 + \exp \left( \frac{V - V_{1/2,h,i}}{k_{h,i}} \right) \right)^{-x} \quad (5)$$

where  $C$  is the membrane capacitance;  $V$  is the voltage across the membrane; and for each ion channel  $i$ ,  $g_i$  is the conductance,  $E_i$  is the reversal potential,  $\bar{g}_i$  is the maximal conductance,  $m_i$  is the activation variable,  $h_i$  is the inactivation variable, and  $M_i$  and  $H_i$  are suitable parameters that are dependent on the kinetics of the channel activation/inactivation.

The time-varying membrane potential-dependent functions  $m_i(V)$ ,  $h_i(V)$  in eq. (4) are typically described using nonlinear functions (e.g.,  $m_{\infty,i} = f(V)$ ) depending on the parameterized form of Boltzmann functions characterized by half-activation voltage,  $V_{1/2}$  and activation curve slope factor,  $k$ .

For channels characterized by the Hodgkin-Huxley formalism, the gating variable ( $p_i$ , analogous to  $m_i$  and  $h_i$ ) is based on the probability of an individual gate being in a permissive state. Thus  $(1 - p_i)$  is the probability of a non-permissive state. The transition between these states is described by first order kinetics:

$$\frac{dp_i}{dt} = \alpha_i(V)(1 - p_i) - \beta_i(V)p_i \quad (6)$$

in which  $\alpha_i$  and  $\beta_i$  are voltage-dependent rate constants describing the ‘‘non-permissive to permissive’’ and ‘‘permissive to non-permissive’’ transition rates, respectively. The time course for approaching the equilibrium value of the gating variable ( $p_{\infty,i}$ ) can be described by a  $\tau_i$  term. The resulting expressions used for solving eq. (6) are:

$$p_{\infty,i} = \frac{\alpha_i(V)}{\alpha_i(V) + \beta_i(V)} \quad \tau_{p,i} = \frac{1}{\alpha_i(V) + \beta_i(V)} \quad (7)$$

In our modified model,  $K_{DR}$  activation was represented by a fourth order Boltzmann function ( $x = 4$  in eq. (5)) based on experimental data from rat brain thalamic relay neurons [1]. The half activation voltage was set to 2.3 mV based on voltage-clamp data from brainstem neurons [2]. Our electrophysiology model was simulated as a single compartment (Figure 1B) with the following properties [3]: cell area = 0.0025 mm<sup>2</sup>, membrane capacitance  $C_m = 1$  uF/cm<sup>2</sup>, and  $E_{leak}$  was set to maintain baseline firing rates at approximately 1.1 Hz in all simulations.

### S3 Calcium baseline-dependent dampening of electrophysiological responses to AngII

We found that the baseline firing rate was elevated in the high  $Ca^{2+}$  baseline state (Figure S2A). This finding is consistent with elevated levels of active PKC and CaMKII leading to increased levels of  $K_{DR}$  phosphorylation and coincident reduction in hyperpolarizing drive. The excitability response for the high  $Ca^{2+}$  baseline condition was smaller and slower than that of the low  $Ca^{2+}$  baseline response. However, the steady state firing rates ( $t = 300$  s) for high and low  $Ca^{2+}$  states were nearly identical, indicating that AngII normalizes the firing rates of cells with divergent  $Ca^{2+}$  baseline levels. To determine the electrophysiological basis of the observed excitability differences, we first examined membrane potential traces before and after applying AngII (Figure S2B). Membrane potentials during inter-spike intervals were at approximately -50 mV for both  $Ca^{2+}$  baseline conditions. Action potential waveforms and thresholds were also similar for high and low  $Ca^{2+}$  baseline states, both before and after applying AngII (Figure S2C). These results suggest that subtle differences in ionic currents during inter-spike intervals account for the  $Ca^{2+}$  baseline-dependent differences in firing rates.

To assess the ionic contributions to the membrane potential during inter-spike intervals, we examined membrane potential and current waveforms mediated by  $Na^+$ ,  $K_{DR}$ , and  $K_{AHP}$  channels during intervals between APs ( $K_A$  and  $Ca_L$  currents were omitted because these did not vary in our simulations) (Figure S2D). For the high  $Ca^{2+}$  baseline state, firing rates were faster but the membrane potential was more hyperpolarized between APs. The high  $Ca^{2+}$  baseline state showed reduced  $Na^+$  and  $K_{DR}$  currents along with increased  $K_{AHP}$  current between APs, compared to the low  $Ca^{2+}$  baseline state. These results are consistent with increased excitability in the high  $Ca^{2+}$  baseline states associated with enhanced  $Na^+$  recovery from inactivation (Figure S3). Following AngII application, excitability properties were nearly identical for the low and high  $Ca^{2+}$  baseline states. This suggests that AngII drives divergent  $Ca^{2+}$  baseline neuronal conditions to a comparable electrophysiological state.



Table S1: **List of signaling pathway models.**

| No. | Signaling pathway models                          | Initial parameter Ref. |
|-----|---------------------------------------------------|------------------------|
| 1   | Gq pathway activation                             | [4–6]                  |
| 2   | PLC $\beta$ hydrolysis                            | [4]                    |
| 3   | IP3 3-kinase activation                           | [4]                    |
| 4   | I(145)P3 dephosphorylation                        | [4]                    |
| 5   | I(1345)P4 dephosphorylation                       | [4]                    |
| 6   | Multiple inositol polyphosphate phosphatase       | [4]                    |
| 7   | Interactions between Inositol high polyphosphates | [4]                    |
| 8   | Dynamics of IP4 interactions                      | [4]                    |
| 9   | I(134)P3 dephosphorylation                        | [4]                    |
| 10  | Calcium regulation                                | [3, 4, 7–11]           |
| 11  | Calcium binding to calmodulin                     | [4]                    |
| 12  | CaMKII activation                                 | [4, 12]                |
| 13  | Protein kinase C activation                       | [4, 7, 12, 13]         |

Table S2: Calcium regulation model. A schematic of the model is shown in [Figure 2A](#).

| Modulation                                                                                                                                                                                                                                                                                                                                                                                                                                                                                                                               | Reaction                                                                                                                                                                                                                                                                                                                                                                                                                                                                                                                                                                                                                                                                                                                                                                                                                | Parameters                                                            | Ref. |        |
|------------------------------------------------------------------------------------------------------------------------------------------------------------------------------------------------------------------------------------------------------------------------------------------------------------------------------------------------------------------------------------------------------------------------------------------------------------------------------------------------------------------------------------------|-------------------------------------------------------------------------------------------------------------------------------------------------------------------------------------------------------------------------------------------------------------------------------------------------------------------------------------------------------------------------------------------------------------------------------------------------------------------------------------------------------------------------------------------------------------------------------------------------------------------------------------------------------------------------------------------------------------------------------------------------------------------------------------------------------------------------|-----------------------------------------------------------------------|------|--------|
| Calcium transport to ER                                                                                                                                                                                                                                                                                                                                                                                                                                                                                                                  | $2\text{Ca}_{\text{cyt}}^{2+} + \text{CaTransp} \xrightleftharpoons[k_b]{k_f} \text{CaTransp} - 2\text{Ca}^{2+}$                                                                                                                                                                                                                                                                                                                                                                                                                                                                                                                                                                                                                                                                                                        | $k_f = 3600 \mu\text{M}^{-2}\text{s}^{-1}; k_b = 144 \text{s}^{-1}$   | [4]  |        |
|                                                                                                                                                                                                                                                                                                                                                                                                                                                                                                                                          | $\text{CaTransp} - 2\text{Ca}^{2+} \xrightarrow{k_f} \text{CaTransp} + 2\text{Ca}_{\text{seq}}^{2+}$                                                                                                                                                                                                                                                                                                                                                                                                                                                                                                                                                                                                                                                                                                                    | $k_f = 25 \text{s}^{-1}$                                              |      |        |
|                                                                                                                                                                                                                                                                                                                                                                                                                                                                                                                                          | $\text{Ca}_{\text{seq}}^{2+} + \text{CaTransp} \xrightleftharpoons[k_b]{k_f} \text{CaTransp} + \text{Ca}_{\text{cyt}}^{2+}$                                                                                                                                                                                                                                                                                                                                                                                                                                                                                                                                                                                                                                                                                             | $k_f = 8 \text{s}^{-1}; k_b = 8 \text{s}^{-1}$                        |      |        |
| Calcium buffer                                                                                                                                                                                                                                                                                                                                                                                                                                                                                                                           | $5\text{Ca}_{\text{seq}}^{2+} + \text{Cabuffer} \xrightleftharpoons[k_b]{k_f} \text{Cabuffer} - 5\text{Ca}^{2+}$                                                                                                                                                                                                                                                                                                                                                                                                                                                                                                                                                                                                                                                                                                        | $k_f = 0.000489 \mu\text{M}^{-5}\text{s}^{-1}; k_b = 1 \text{s}^{-1}$ | [4]  |        |
|                                                                                                                                                                                                                                                                                                                                                                                                                                                                                                                                          | $5\text{Ca}_{\text{seq}}^{2+} + \text{Cabuffer} - 5\text{Ca}^{2+} \xrightleftharpoons[k_b]{k_f} \text{Cabuffer} - 10\text{Ca}^{2+}$                                                                                                                                                                                                                                                                                                                                                                                                                                                                                                                                                                                                                                                                                     | $k_f = 0.000489 \mu\text{M}^{-5}\text{s}^{-1}; k_b = 1 \text{s}^{-1}$ |      |        |
|                                                                                                                                                                                                                                                                                                                                                                                                                                                                                                                                          | $5\text{Ca}_{\text{seq}}^{2+} + \text{Cabuffer} - 10\text{Ca}^{2+} \xrightleftharpoons[k_b]{k_f} \text{Cabuffer} - 15\text{Ca}^{2+}$                                                                                                                                                                                                                                                                                                                                                                                                                                                                                                                                                                                                                                                                                    | $k_f = 0.000489 \mu\text{M}^{-5}\text{s}^{-1}; k_b = 1 \text{s}^{-1}$ |      |        |
|                                                                                                                                                                                                                                                                                                                                                                                                                                                                                                                                          | $5\text{Ca}_{\text{seq}}^{2+} + \text{Cabuffer} - 15\text{Ca}^{2+} \xrightleftharpoons[k_b]{k_f} \text{Cabuffer} - 20\text{Ca}^{2+}$                                                                                                                                                                                                                                                                                                                                                                                                                                                                                                                                                                                                                                                                                    | $k_f = 0.000489 \mu\text{M}^{-5}\text{s}^{-1}; k_b = 1 \text{s}^{-1}$ |      |        |
|                                                                                                                                                                                                                                                                                                                                                                                                                                                                                                                                          | $5\text{Ca}_{\text{seq}}^{2+} + \text{Cabuffer} - 20\text{Ca}^{2+} \xrightleftharpoons[k_b]{k_f} \text{Cabuffer} - 25\text{Ca}^{2+}$                                                                                                                                                                                                                                                                                                                                                                                                                                                                                                                                                                                                                                                                                    | $k_f = 0.000489 \mu\text{M}^{-5}\text{s}^{-1}; k_b = 1 \text{s}^{-1}$ |      |        |
|                                                                                                                                                                                                                                                                                                                                                                                                                                                                                                                                          | $5\text{Ca}_{\text{seq}}^{2+} + \text{Cabuffer} - 25\text{Ca}^{2+} \xrightleftharpoons[k_b]{k_f} \text{Cabuffer} - 30\text{Ca}^{2+}$                                                                                                                                                                                                                                                                                                                                                                                                                                                                                                                                                                                                                                                                                    | $k_f = 0.000489 \mu\text{M}^{-5}\text{s}^{-1}; k_b = 1 \text{s}^{-1}$ |      |        |
|                                                                                                                                                                                                                                                                                                                                                                                                                                                                                                                                          | $5\text{Ca}_{\text{seq}}^{2+} + \text{Cabuffer} - 30\text{Ca}^{2+} \xrightleftharpoons[k_b]{k_f} \text{Cabuffer} - 35\text{Ca}^{2+}$                                                                                                                                                                                                                                                                                                                                                                                                                                                                                                                                                                                                                                                                                    | $k_f = 0.000489 \mu\text{M}^{-5}\text{s}^{-1}; k_b = 1 \text{s}^{-1}$ |      |        |
|                                                                                                                                                                                                                                                                                                                                                                                                                                                                                                                                          | $5\text{Ca}_{\text{seq}}^{2+} + \text{Cabuffer} - 35\text{Ca}^{2+} \xrightleftharpoons[k_b]{k_f} \text{Cabuffer} - 40\text{Ca}^{2+}$                                                                                                                                                                                                                                                                                                                                                                                                                                                                                                                                                                                                                                                                                    | $k_f = 0.000489 \mu\text{M}^{-5}\text{s}^{-1}; k_b = 1 \text{s}^{-1}$ |      |        |
| Capacitive calcium entry to ER                                                                                                                                                                                                                                                                                                                                                                                                                                                                                                           | $\text{Ca}_{\text{seq}}^{2+} + \text{Capacitive} - \text{Ca}_{\text{active}} \xrightleftharpoons[k_b]{k_f} \text{Capacitive} - \text{Ca}_{\text{inactive}}$                                                                                                                                                                                                                                                                                                                                                                                                                                                                                                                                                                                                                                                             | $k_f = 0.6912 \#^{-1}\text{s}^{-1}; k_b = 6.25 \text{s}^{-1}$         | [4]  |        |
| Calcium extracellular pump                                                                                                                                                                                                                                                                                                                                                                                                                                                                                                               | $\text{Ca}_{\text{cyt}}^{2+} + \text{CaEpump} \xrightleftharpoons[k_b]{k_f} \text{CaEpump} - \text{Ca}^{2+}$                                                                                                                                                                                                                                                                                                                                                                                                                                                                                                                                                                                                                                                                                                            | $k_f = 1800 \mu\text{M}^{-1}\text{s}^{-1}; k_b = 288 \text{s}^{-1}$   | [4]  |        |
|                                                                                                                                                                                                                                                                                                                                                                                                                                                                                                                                          | $\text{CaEpump} - \text{Ca}^{2+} \xrightarrow{k_f} \text{Ca}_{\text{ext}}^{2+}$                                                                                                                                                                                                                                                                                                                                                                                                                                                                                                                                                                                                                                                                                                                                         | $k_f = 72 \text{s}^{-1}$                                              |      |        |
|                                                                                                                                                                                                                                                                                                                                                                                                                                                                                                                                          | $\text{Ca}_{\text{ext}}^{2+} + \text{CaEpump}_{\text{leak}} \xrightleftharpoons[k_b]{k_f} \text{CaEpump}_{\text{leak}} + \text{Ca}_{\text{cyt}}^{2+}$                                                                                                                                                                                                                                                                                                                                                                                                                                                                                                                                                                                                                                                                   | $k_f = 0.2 \text{s}^{-1}; k_b = 0.2 \text{s}^{-1}$                    |      |        |
|                                                                                                                                                                                                                                                                                                                                                                                                                                                                                                                                          | $\text{Ca}_{\text{ext}}^{2+} + \text{CapacitiveChannel} \xrightleftharpoons[k_b]{k_f} \text{CapacitiveChannel} + \text{Ca}_{\text{cyt}}^{2+}$                                                                                                                                                                                                                                                                                                                                                                                                                                                                                                                                                                                                                                                                           | $k_f = 0.01 \text{s}^{-1}; k_b = 0.01 \text{s}^{-1}$                  |      |        |
| IP3R activation                                                                                                                                                                                                                                                                                                                                                                                                                                                                                                                          | $\text{IP3R} + 3\text{IP3} - 145 \xrightleftharpoons[k_b]{k_f} \text{IP3R}_{\text{active}}$                                                                                                                                                                                                                                                                                                                                                                                                                                                                                                                                                                                                                                                                                                                             | $k_f = 0.05 \mu\text{M}^{-3}\text{s}^{-1}; k_b = 1 \text{s}^{-1}$     | [4]  |        |
|                                                                                                                                                                                                                                                                                                                                                                                                                                                                                                                                          | $\text{Ca}_{\text{seq}}^{2+} + \text{IP3R}_{\text{active}} \xrightleftharpoons[k_b]{k_f} \text{IP3R}_{\text{active}} + \text{Ca}_{\text{cyt}}^{2+}$                                                                                                                                                                                                                                                                                                                                                                                                                                                                                                                                                                                                                                                                     | $k_f = 3125 \text{s}^{-1}; k_b = 3125 \text{s}^{-1}$                  |      |        |
| Sodium-calcium exchanger                                                                                                                                                                                                                                                                                                                                                                                                                                                                                                                 | $r_{\text{NaCa}} = r_o \cdot m_{\text{GHK}} \cdot m_{\text{chemical}}$ $m_{\text{chemical}} = - \left( 1 + \frac{K_{\text{PKCmod}}}{1 + \exp\left(\frac{K_{\text{PKC}} - 100[\text{PKC}]}{D_{\text{PKC}}}\right) - 3} \right) \left( \frac{[\text{Ca}_{\text{cyt}}^{2+}]}{k_m + [\text{Ca}_{\text{cyt}}^{2+}]} \right) \left( \frac{[\text{Ca}_{\text{cyt}}^{2+}]}{\text{NaCa}_{\text{act}} + [\text{Ca}_{\text{cyt}}^{2+}]} \right)$ $m_{\text{GHK}} = - \frac{\left( [\text{Ca}_{\text{ext}}^{2+}][\text{Na}_{\text{cyt}}^+]^3 \exp(\gamma\zeta) \right) - \left( [\text{Ca}_{\text{cyt}}^{2+}][\text{Na}_{\text{ext}}^+]^3 \exp((\gamma-1)\zeta) \right)}{1 + D_{\text{NaCa}} \left( [\text{Ca}_{\text{cyt}}^{2+}][\text{Na}_{\text{ext}}^+]^3 - [\text{Ca}_{\text{ext}}^{2+}][\text{Na}_{\text{cyt}}^+]^3 \right)}$ |                                                                       |      | [8-11] |
| $r_{\text{NaCa}}$ = total $\text{Ca}^{2+}$ flux, $r_o$ = nominal flux gradient, $m_{\text{GHK}}$ = electro-chemical flux across NCX, and $m_{\text{chemical}}$ = chemical gradient<br>$K_{\text{PKCmod}} = 0.5$ , $K_{\text{PKC}} = 10$ , $D_{\text{PKC}} = 2$ , $k_m = 2$ , $\text{NaCa}_{\text{act}} = 0.2$<br>$\gamma = 0.5$ , $\zeta = \frac{zV_m F}{RT}$ , $z = 2$ , $F = 96500 \text{ C mol}^{-1}$ , $T = 310 \text{ K}$ , $R = 8314 \text{ J kg}^{-1} \text{ mol}^{-1} \text{ K}^{-1}$ , $D_{\text{NaCa}} = 0.05 \text{ nM}^{-4}$ |                                                                                                                                                                                                                                                                                                                                                                                                                                                                                                                                                                                                                                                                                                                                                                                                                         |                                                                       |      |        |

cyt – cytosolic; seq – sequestered; ext – extracellular; and  $V_m$  – membrane potential

Table S3: Equations for the voltage dependence and kinetic current for brainstem neurons.

| Current    | Expression                                                           | Ref.                                                                                                                                                   |        |
|------------|----------------------------------------------------------------------|--------------------------------------------------------------------------------------------------------------------------------------------------------|--------|
| $I_{Na}$   | $m_{\infty Na}$                                                      | $\frac{0.091 \cdot (V + 38)/(1 - \exp(-(V + 38)/5))}{0.091 \cdot (V + 38)/(1 - \exp(-(V + 38)/5)) + 0.062 \cdot (V + 38)/(\exp((V + 38)/5) - 1)}$      | [3]    |
|            | $\bar{g}_{Na} \cdot m_{Na}^3 \cdot h_{Na} \cdot (E_{Na} - V)$        | $\tau_{mNa} \cdot (1/(0.091 \cdot (V + 38)))/(1 - \exp(-(V + 38)/5)) + 0.062 \cdot (V + 38)/(\exp((V + 38)/5) - 1)$                                    |        |
|            | $h_{\infty Na}$                                                      | $\frac{0.016 \cdot \exp(-(V + 55)/15)}{0.016 \cdot \exp(-(V + 55)/15) + 2.07/(1 + \exp(-(V - 17)/21))}$                                                |        |
|            | $\tau_{hNa}$                                                         | $1/(0.016 \cdot \exp(-(V + 55)/15)) + 2.07/(1 + \exp(-(V - 17)/21))$                                                                                   |        |
| $I_{KDR}$  | $\bar{g}_{KDR} \cdot m_{KDR}^4 \cdot (E_K - V)$                      | $m_{\infty KDR} \cdot (1 + \exp((V_{12} - V)/k))^{-4}$                                                                                                 | [1]    |
|            |                                                                      | $\tau_{mKDR} \cdot \frac{1}{4} \cdot (1/(\exp((V - 81)/25.6)) + \exp((-V + 132)/18)) + 9.9$                                                            |        |
| $I_{KA}$   | $m_{\infty KA}$                                                      | $1/(1 + \exp(V + 36/20))$                                                                                                                              | [3]    |
|            | $\bar{g}_{KA} \cdot 0.4 \cdot m_{KA}^4 \cdot h_{KA} \cdot (E_K - V)$ | $\tau_{mKA} \cdot 1/(\exp(V + 35.82)/19.69) + \exp(-V + 79.69)/12.7 + 0.37$                                                                            |        |
|            | $h_{\infty KA}$                                                      | $1/(1 + \exp(V + 78/6))$                                                                                                                               |        |
|            | $\tau_{hKA}$                                                         | $1/(\exp(V + 46.05)/5) + \exp(-V + 238.4)/37.45$ if $V < -63$ , else $\tau_{hKA} = 60.0$                                                               |        |
| $I_{KAHP}$ | $\bar{g}_{KAHP} \cdot m_{KAHP}^2 \cdot (E_K - V)$                    | $m_{\infty KAHP} \cdot \frac{1.25 \cdot 10^{-8} [Ca_{cyt}^{+2}]^2}{(1.25 \cdot 10^{-8} [Ca_{cyt}^{+2}]^2) + 2.5}$                                      | [3, 8] |
|            |                                                                      | $\tau_{mKAHP} \cdot 1000/((1.25 \cdot 10^{-8} [Ca_{cyt}^{+2}]^2) + 2.5)$                                                                               |        |
| $I_{CaL}$  | $\bar{g}_{CaL} \cdot m_{CaL}^2 \cdot (E_{Ca} - V)$                   | $m_{\infty CaL} \cdot \frac{1.6/(\exp(-0.072 \cdot (V - 5)))}{1.6/(\exp(-0.072 \cdot (V - 5))) + (0.02 \cdot (V - 1.31)/(\exp((V - 1.31)/5.36) - 1))}$ | [3]    |
|            |                                                                      | $\tau_{mCaL} \cdot 1/(1.6/(\exp(-0.072 \cdot (V - 5))) + (0.02 \cdot (V - 1.31)/(\exp((V - 1.31)/5.36) - 1)))$                                         |        |
| $I_{leak}$ | $g_{leak} \cdot (E_{leak} - V)$                                      | -                                                                                                                                                      | [3]    |

$$\frac{dV_m}{dt} = \frac{1}{C_m} \cdot (I_{Na} + I_{KDR} + I_{KA} + I_{KAHP} + I_{CaL} + I_{leak})$$

Note that  $Ca_{cyt}^{+2}$  used in this Table is different from the cytosolic  $Ca^{+2}$  in Table S2. See first subsection of the Results for details.  
 $I_{Na}$  – Fast sodium current,  $I_{KDR}$  – Delayed rectifier potassium current,  $I_{KA}$  – Fast activating potassium current  
 $I_{KAHP}$  – Hyperpolarized calcium dependent potassium current,  $I_{CaL}$  – High threshold calcium current

Table S4: Model of phosphorylation of ion-channels through intermediate kinetics.

| Reaction                                                                                           | Rates                                                                    | Parameters                                 |
|----------------------------------------------------------------------------------------------------|--------------------------------------------------------------------------|--------------------------------------------|
| $K_U + 4 PKC \xrightleftharpoons[k_{dp,PKC}]{k_{p,PKC}} K_{PKC} + 4 PKC$                           | $k_{p,PKC}[K_U][PKC]^4 - k_{dp,PKC}[K_{PKC}]$                            | $k_{p,PKC} = 10; k_{dp,PKC} = 0.7312$      |
| $K_U + 4 CaMKII \xrightleftharpoons[k_{dp,CaMKII}]{k_{p,CaMKII}} K_{CaMKII} + 4 CaMKII$            | $k_{p,CaMKII}[K_U][CaMKII]^4 - k_{dp,CaMKII}[K_{CaMKII}]$                | $k_{p,CaMKII} = 1; k_{dp,CaMKII} = 3.3215$ |
| $K_{CaMKII} + 4 CaMKII \xrightleftharpoons[k_{dp,CaMKII}]{k_{p,CaMKII}} K_{PKC,CaMKII} + 4 CaMKII$ | $k_{p,CaMKII}[K_{PKC,CaMKII}][CaMKII]^4 - k_{dp,CaMKII}[K_{PKC,CaMKII}]$ | $k_{p,CaMKII} = 1; k_{dp,CaMKII} = 3.3215$ |
| $K_{PKC} + 4 PKC \xrightleftharpoons[k_{dp,PKC}]{k_{p,PKC}} K_{PKC,CaMKII} + 4 PKC$                | $k_{p,PKC}[K_{CaMKII}][PKC]^4 - k_{dp,PKC}[K_{PKC,CaMKII}]$              | $k_{p,PKC} = 10; k_{dp,PKC} = 0.7312$      |

$K_U$  – Unphosphorylated potassium ion-channels ( $K_{DR}$ ),  $K_{PKC}$ ,  $K_{CaMKII}$  and  $K_{PKC,CaMKII}$  – phosphorylated potassium ion-channels ( $K_{DR}$ )

Table S5: **Hill function models of signaling responses to AngII. Peak and steady state responses were separately normalized and fitted as functions of AngII concentration. Value pairs refer to the peak parameter value followed by the steady state parameter value.**

|        | Low $\text{Ca}^{2+}$ |            | High $\text{Ca}^{2+}$ |            |
|--------|----------------------|------------|-----------------------|------------|
|        | $K_{0.5}$ (nM)       | nH         | $K_{0.5}$ (nM)        | nH         |
| PLC    | 4.8, 5.51            | 1.06, 1.21 | 4.2, 4.3              | 1.04, 1.04 |
| IP3    | 11.1, 9.3            | 1.06, 1.11 | 9.9, 9.9              | 1.08, 1.08 |
| PKC    | 3.4, 3.3             | 1.07, 1.37 | 3.8, 3.8              | 1.03, 1.03 |
| CaMKII | 12.6, 12.6           | 1.59, 1.59 | 2.4, 2.4              | 1.51, 1.52 |

Table S6: **Hill function models of excitability responses to AngII. Peak and steady state responses were separately normalized and fitted as functions of AngII concentration. Value pairs refer to the peak parameter value followed by the steady state parameter value.**

| Phenotype            | $K_{0.5}$ (nM) | nH         |
|----------------------|----------------|------------|
| Wildtype             | 25.6, 26.4     | 1.55, 1.53 |
| Blocking PKC site    | 7.8, 6.3       | 1.09, 1.24 |
| Blocking CaMKII site | 4.1, 4.3       | 1.16, 1.50 |



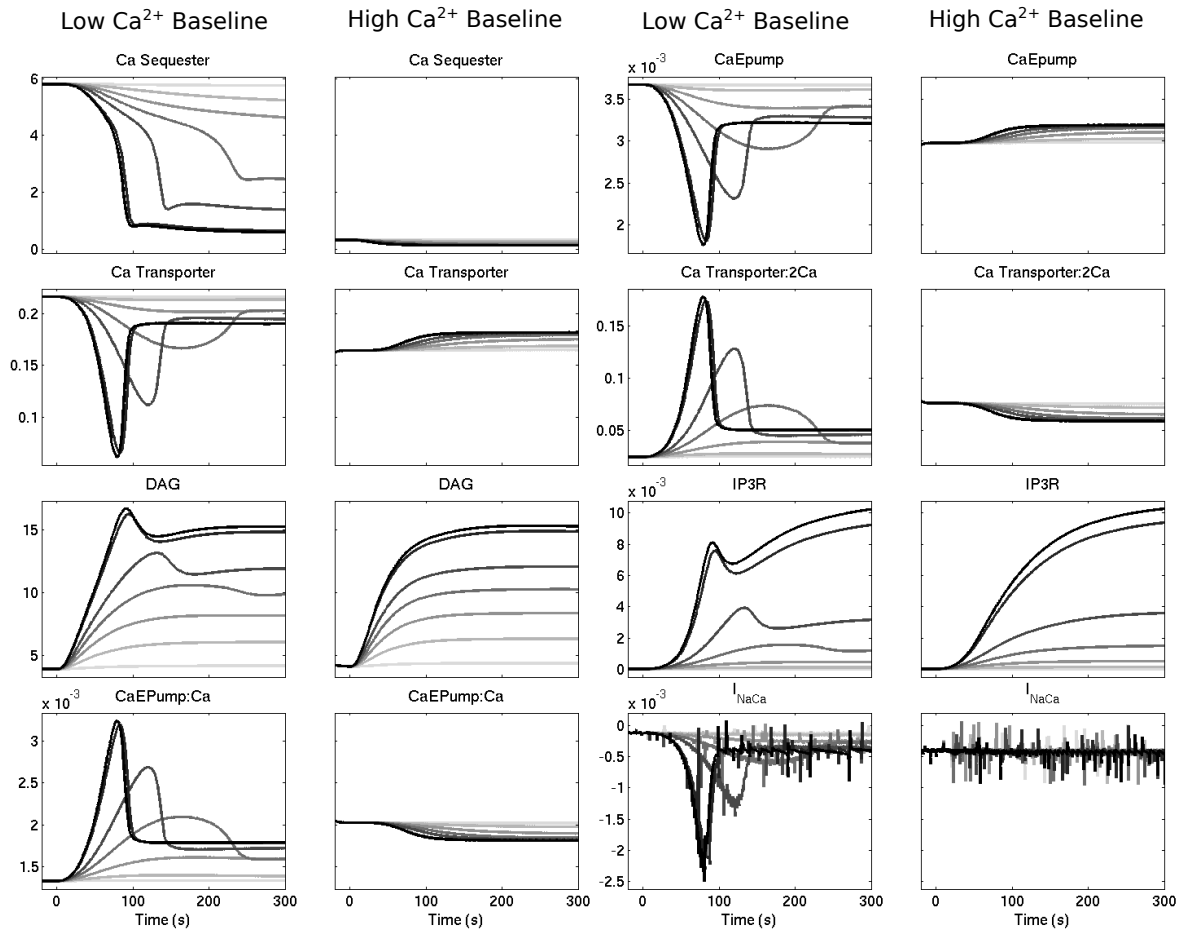

Figure S1: **Additional plots to Figure 2 of AngII elicited responses to different  $\text{Ca}^{2+}$  baseline conditions.** Low  $\text{Ca}^{2+}$  baseline and high  $\text{Ca}^{2+}$  baseline response plots to different doses of AngII for sequestered  $\text{Ca}^{2+}$ , CaTranp, DAG, CaEpump:Ca, CaEpump, CaTranp:2Ca, IP3R (IP3-bound IP3R) and NCX current ( $I_{\text{NaCa}}$ ).

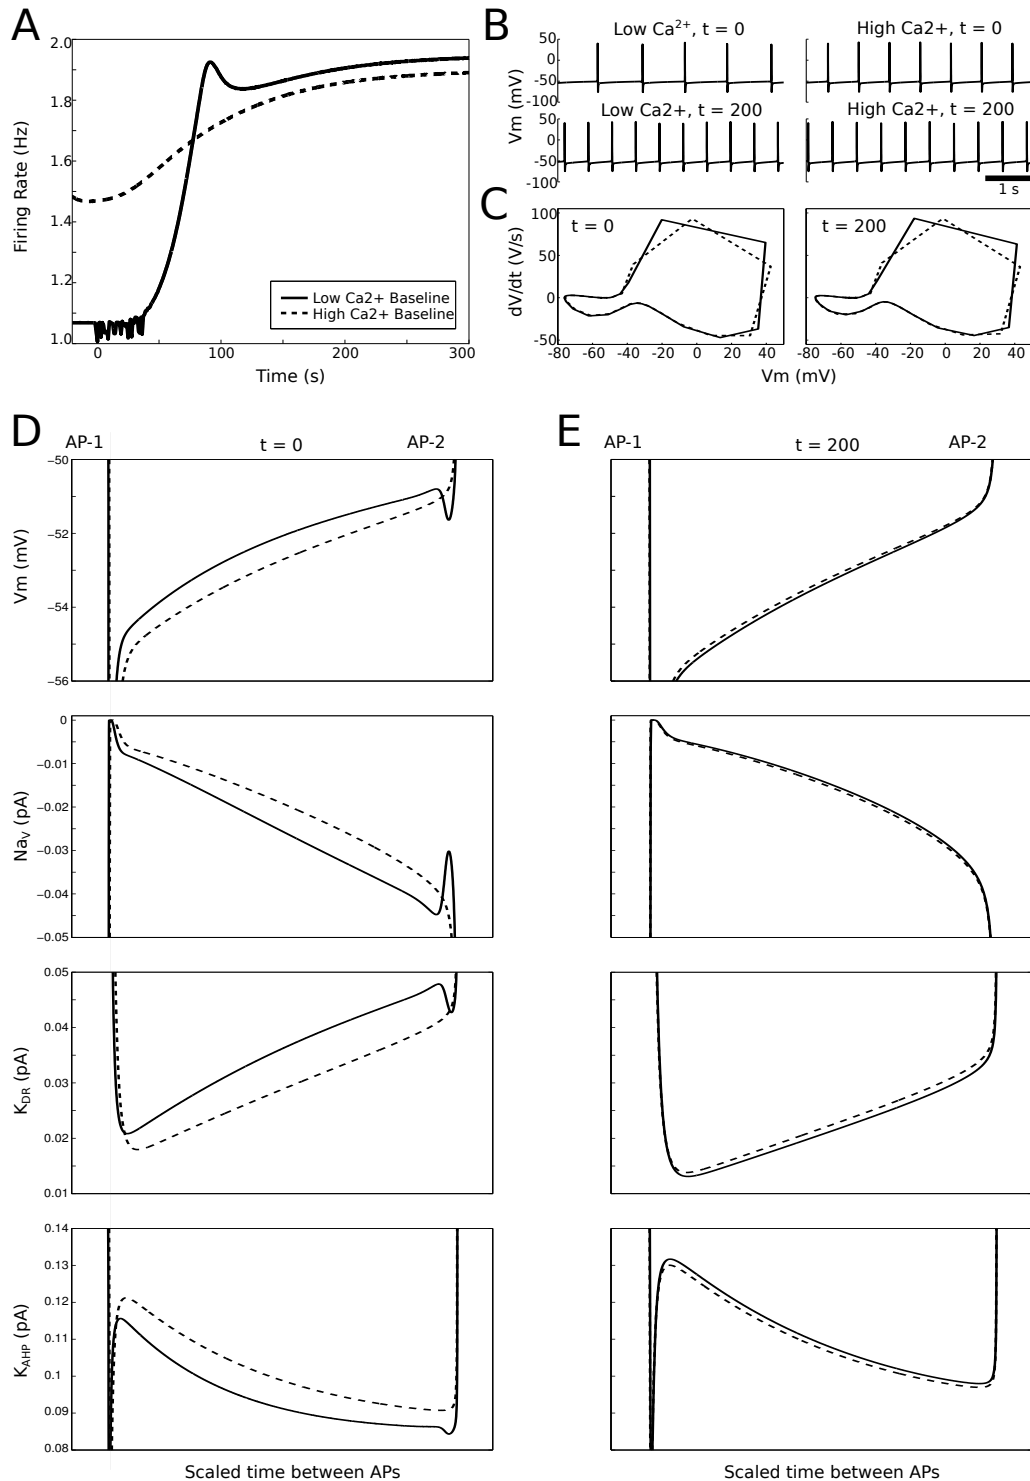

Figure S2: **Low  $\text{Ca}^{2+}$  baseline neuronal state exhibits a larger increase in AngII-induced excitability.** (A) Firing rate responses to AngII (100 nM at  $t = 0$  s) are shown for low and high  $\text{Ca}^{2+}$  baseline levels. (B) Membrane potential waveforms are shown before ( $t = 0$  s) and after ( $t = 200$  s) AngII effects have stabilized. (C) Phase-space representations of APs before and after AngII (same legend as in panel A). (D) Biophysical differences between the low and high  $\text{Ca}^{2+}$  baseline conditions (same legend as in panel A). All data are plotted during normalized time intervals between two APs (AP-1 and AP-2) to show the inter-spike interval properties either before (left,  $t = 0$  s) or after (right,  $t = 200$  s) AngII stimulation. Abbreviations:  $V_m$  = membrane potential,  $\text{Na}_V$  =  $\text{Na}^+$  current,  $K_{DR}$  =  $K_{DR}$  current,  $K_{AHP}$  =  $K_{AHP}$  current.

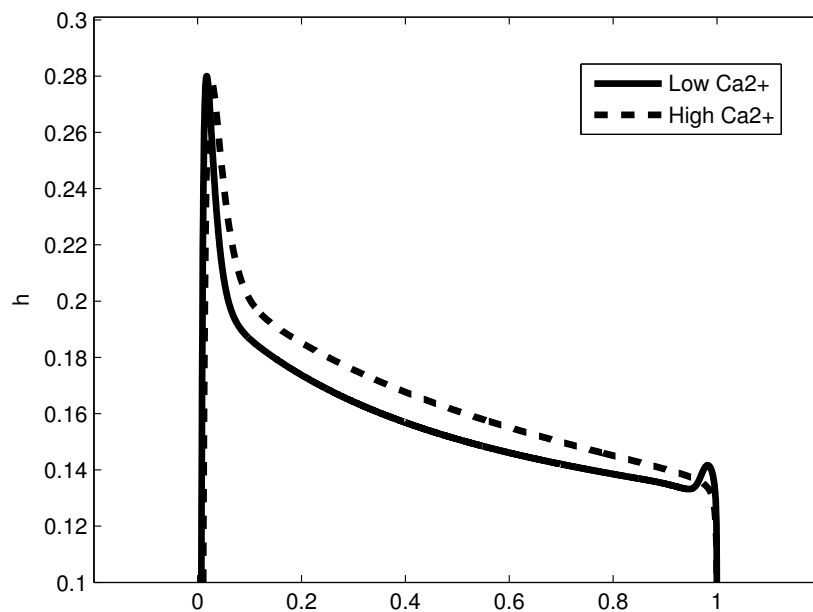

Figure S3: **Inactivation variable ( $h$ ) for  $\text{Na}^+$  channel at steady state for high and low  $\text{Ca}^{2+}$  baseline states.** Normalized time between two action potentials is represented as 0 to 1 on  $x$ -axis.

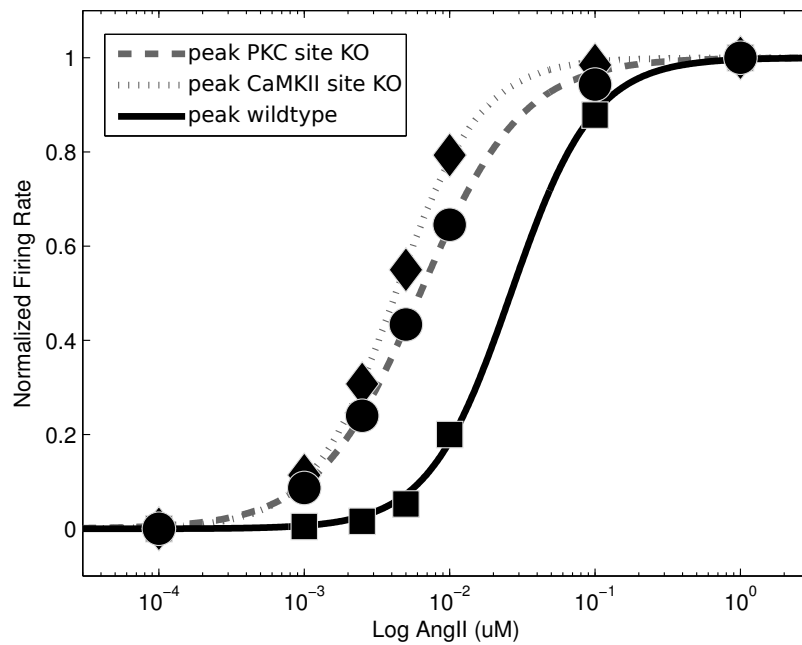

Figure S4: **Peak dose response curves for different blocking conditions of kinases.**

## Supporting References

- [1] J Huguenard and D Prince. Slow inactivation of a TEA-sensitive K current in acutely isolated rat thalamic relay neurons. *Journal of neurophysiology*, 66(4):1316–1328, 1991.
- [2] C Gelband, J Warth, H Mason, M Zhu, J Moore, J Kenyon, B Horowitz, and C Summers. Angiotensin II type 1 receptor-mediated inhibition of K<sup>+</sup> channel subunit kv2.2 in brain stem and hypothalamic neurons. *Circulation research*, 84(3):352–359, 1999.
- [3] I Rybak, J Paton, and J Schwaber. Modeling neural mechanisms for genesis of respiratory rhythm and pattern. i. models of respiratory neurons. *Journal of neurophysiology*, 77(4):1994–2006, 1997.
- [4] J Mishra and U Bhalla. Simulations of inositol phosphate metabolism and its interaction with InsP<sub>3</sub>-Mediated calcium release. *Biophysical Journal*, 83(3):1298–1316, 2002.
- [5] R Ouali, M Berthelon, M Bégeot, and J Saez. Angiotensin II receptor subtypes AT1 and AT2 are down-regulated by angiotensin II through AT1 receptor by different mechanisms. *Endocrinology*, 138(2):725–733, 1997.
- [6] H Yang, D Lu, G Vinson, and M Raizada. Involvement of MAP kinase in angiotensin II-induced phosphorylation and intracellular targeting of neuronal AT1 receptors. *The Journal of Neuroscience*, 17(5):1660–1669, 1997.
- [7] S Pan, M Zhu, M Raizada, C Summers, and C Gelband. ANG II-mediated inhibition of neuronal delayed rectifier K<sup>+</sup> current: role of protein kinase C- $\alpha$ . *American journal of physiology. Cell physiology*, 281(1):C17–23, 2001.
- [8] A Athanasiades, Jr Clark, J, F Ghorbel, and A Bidani. An ionic current model for medullary respiratory neurons. *Journal of computational neuroscience*, 9(3):237–257, 2000.
- [9] T Iwamoto, S Wakabayashi, and M Shigekawa. Growth factor-induced phosphorylation and activation of aortic smooth muscle Na<sup>+</sup>/Ca<sup>2+</sup> exchanger. *The Journal of biological chemistry*, 270(15):8996–9001, 1995.
- [10] T Iwamoto, T Watano, and M Shigekawa. A novel isothiourea derivative selectively inhibits the reverse mode of Na<sup>+</sup>/Ca<sup>2+</sup> exchange in cells expressing NCX1. *Journal of Biological Chemistry*, 271(37):22391–22397, 1996.
- [11] K Philipson, D Nicoll, M Ottolia, B Quednau, H Reuter, S John, and Z Qiu. The Na<sup>+</sup>/Ca<sup>2+</sup> exchange molecule: an overview. *Annals of the New York Academy of Sciences*, 976:1–10, 2002.
- [12] M Zhu, C Gelband, P Posner, and C Summers. Angiotensin II decreases neuronal delayed rectifier potassium current: role of calcium/calmodulin-dependent protein kinase II. *Journal of neurophysiology*, 82(3):1560–1568, 1999.
- [13] D Wang, C Summers, P Posner, and C Gelband. A-type K<sup>+</sup> current in neurons cultured from neonatal rat hypothalamus and brain stem: modulation by angiotensin II. *Journal of neurophysiology*, 78(2):1021–1029, 1997.
